# Supplementary material
Source: MDPI journal article supplement (https://www.mdpi.com/2072-4292/14/20/5080)
Supplement: s1 [file s1]

## Supplemental Information

**Table S1.** Ground classification results based on different laser pulse emission wavelengths (Green, NIR, SWIR), software used, and the classification parameters, described in Tables 1 and 2. Here we also show the difference in elevation (abs. avg. dz), standard deviation of the returns, and root mean squared error (RMSE).

| Wavelength(s) | Software  | Classification | Land Cover Type   | Points/m2 | Abs. Avg. dz | St. Dev. | RMSE |
|---------------|-----------|----------------|-------------------|-----------|--------------|----------|------|
| SWIR          | TerraScan | 9              | Burned            | 0.48      | 0.06         | 0.13     | 0.14 |
| SWIR          | TerraScan | 9              | Burned High Regen | 0.48      | 0.04         | 0.16     | 0.17 |
| SWIR          | TerraScan | 9              | Burned Low Regen  | 0.48      | 0.08         | 0.09     | 0.12 |
| SWIR          | TerraScan | 9              | Road              | 0.48      | 0.01         | 0.05     | 0.05 |
| SWIR          | TerraScan | 9              | Unburned          | 0.48      | 0.03         | 0.19     | 0.19 |
| SWIR          | TerraScan | 14             | Burned            | 0.78      | 0.04         | 0.13     | 0.14 |
| SWIR          | TerraScan | 14             | Burned High Regen | 0.78      | 0.01         | 0.17     | 0.17 |
| SWIR          | TerraScan | 14             | Burned Low Regen  | 0.78      | 0.06         | 0.09     | 0.11 |
| SWIR          | TerraScan | 14             | Road              | 0.78      | 0.01         | 0.05     | 0.05 |
| SWIR          | TerraScan | 14             | Unburned          | 0.78      | 0.06         | 0.19     | 0.20 |
| SWIR          | TerraScan | 19             | Burned            | 1.07      | 0.01         | 0.13     | 0.13 |
| SWIR          | TerraScan | 19             | Burned High Regen | 1.07      | 0.01         | 0.17     | 0.17 |
| SWIR          | TerraScan | 19             | Burned Low Regen  | 1.07      | 0.04         | 0.09     | 0.10 |
| SWIR          | TerraScan | 19             | Road              | 1.07      | 0.01         | 0.05     | 0.05 |
| SWIR          | TerraScan | 19             | Unburned          | 1.07      | 0.09         | 0.19     | 0.21 |
| SWIR          | TerraScan | 24             | Burned            | 1.23      | 0.00         | 0.14     | 0.14 |
| SWIR          | TerraScan | 24             | Burned High Regen | 1.23      | 0.03         | 0.17     | 0.17 |
| SWIR          | TerraScan | 24             | Burned Low Regen  | 1.23      | 0.03         | 0.09     | 0.10 |
| SWIR          | TerraScan | 24             | Road              | 1.23      | 0.01         | 0.05     | 0.05 |
| SWIR          | TerraScan | 24             | Unburned          | 1.23      | 0.10         | 0.19     | 0.21 |
| SWIR          | TerraScan | 1              | Burned            | 0.85      | 0.03         | 0.14     | 0.14 |
| SWIR          | TerraScan | 1              | Burned High Regen | 0.85      | 0.01         | 0.17     | 0.17 |
| SWIR          | TerraScan | 1              | Burned Low Regen  | 0.85      | 0.06         | 0.09     | 0.11 |
| SWIR          | TerraScan | 1              | Road              | 0.85      | 0.01         | 0.05     | 0.05 |
| SWIR          | TerraScan | 1              | Unburned          | 0.85      | 0.07         | 0.19     | 0.20 |
| SWIR          | TerraScan | 2              | Burned            | 0.85      | 0.03         | 0.14     | 0.14 |
| SWIR          | TerraScan | 2              | Burned High Regen | 0.85      | 0.01         | 0.17     | 0.17 |
| SWIR          | TerraScan | 2              | Burned Low Regen  | 0.85      | 0.06         | 0.09     | 0.11 |
| SWIR          | TerraScan | 2              | Road              | 0.85      | 0.01         | 0.05     | 0.05 |
| SWIR          | TerraScan | 2              | Unburned          | 0.85      | 0.07         | 0.19     | 0.20 |
| SWIR          | TerraScan | 3              | Burned            | 0.85      | 0.03         | 0.14     | 0.14 |
| SWIR          | TerraScan | 3              | Burned High Regen | 0.85      | 0.01         | 0.17     | 0.17 |
| SWIR          | TerraScan | 3              | Burned Low Regen  | 0.85      | 0.06         | 0.09     | 0.11 |
| SWIR          | TerraScan | 3              | Road              | 0.85      | 0.01         | 0.05     | 0.05 |
| SWIR          | TerraScan | 3              | Unburned          | 0.85      | 0.07         | 0.19     | 0.20 |
| SWIR          | TerraScan | 4              | Burned            | 0.85      | 0.03         | 0.14     | 0.14 |
| SWIR          | TerraScan | 4              | Burned High Regen | 0.85      | 0.01         | 0.17     | 0.17 |
| SWIR          | TerraScan | 4              | Burned Low Regen  | 0.85      | 0.06         | 0.09     | 0.11 |
| SWIR          | TerraScan | 4              | Road              | 0.85      | 0.01         | 0.05     | 0.05 |
| SWIR          | TerraScan | 4              | Unburned          | 0.85      | 0.07         | 0.19     | 0.20 |
| SWIR          | TerraScan | 5              | Burned            | 0.85      | 0.03         | 0.14     | 0.14 |
| SWIR          | TerraScan | 5              | Burned High Regen | 0.85      | 0.01         | 0.17     | 0.17 |
| SWIR          | TerraScan | 5              | Burned Low Regen  | 0.85      | 0.06         | 0.09     | 0.11 |

|      |           |    |                   |      |      |      |      |
|------|-----------|----|-------------------|------|------|------|------|
| SWIR | TerraScan | 5  | Road              | 0.85 | 0.01 | 0.05 | 0.05 |
| SWIR | TerraScan | 5  | Unburned          | 0.85 | 0.07 | 0.19 | 0.20 |
| SWIR | TerraScan | 6  | Burned            | 0.85 | 0.03 | 0.14 | 0.14 |
| SWIR | TerraScan | 6  | Burned High Regen | 0.85 | 0.01 | 0.17 | 0.17 |
| SWIR | TerraScan | 6  | Burned Low Regen  | 0.85 | 0.06 | 0.09 | 0.11 |
| SWIR | TerraScan | 6  | Road              | 0.85 | 0.01 | 0.05 | 0.05 |
| SWIR | TerraScan | 6  | Unburned          | 0.85 | 0.07 | 0.19 | 0.20 |
| SWIR | TerraScan | 7  | Burned            | 0.85 | 0.03 | 0.14 | 0.14 |
| SWIR | TerraScan | 7  | Burned High Regen | 0.85 | 0.01 | 0.17 | 0.17 |
| SWIR | TerraScan | 7  | Burned Low Regen  | 0.85 | 0.06 | 0.09 | 0.11 |
| SWIR | TerraScan | 7  | Road              | 0.85 | 0.01 | 0.05 | 0.05 |
| SWIR | TerraScan | 7  | Unburned          | 0.85 | 0.07 | 0.19 | 0.20 |
| SWIR | TerraScan | 8  | Burned            | 0.85 | 0.03 | 0.14 | 0.14 |
| SWIR | TerraScan | 8  | Burned High Regen | 0.85 | 0.01 | 0.17 | 0.17 |
| SWIR | TerraScan | 8  | Burned Low Regen  | 0.85 | 0.06 | 0.09 | 0.11 |
| SWIR | TerraScan | 8  | Road              | 0.85 | 0.01 | 0.05 | 0.05 |
| SWIR | TerraScan | 8  | Unburned          | 0.85 | 0.07 | 0.19 | 0.20 |
| SWIR | TerraScan | 10 | Burned            | 0.48 | 0.06 | 0.13 | 0.14 |
| SWIR | TerraScan | 10 | Burned High Regen | 0.48 | 0.04 | 0.16 | 0.17 |
| SWIR | TerraScan | 10 | Burned Low Regen  | 0.48 | 0.09 | 0.10 | 0.13 |
| SWIR | TerraScan | 10 | Road              | 0.48 | 0.01 | 0.05 | 0.05 |
| SWIR | TerraScan | 10 | Unburned          | 0.48 | 0.03 | 0.19 | 0.19 |
| SWIR | TerraScan | 11 | Burned            | 0.48 | 0.06 | 0.13 | 0.14 |
| SWIR | TerraScan | 11 | Burned High Regen | 0.48 | 0.04 | 0.16 | 0.17 |
| SWIR | TerraScan | 11 | Burned Low Regen  | 0.48 | 0.08 | 0.09 | 0.12 |
| SWIR | TerraScan | 11 | Road              | 0.48 | 0.01 | 0.05 | 0.05 |
| SWIR | TerraScan | 11 | Unburned          | 0.48 | 0.03 | 0.19 | 0.19 |
| SWIR | TerraScan | 12 | Burned            | 0.48 | 0.06 | 0.13 | 0.14 |
| SWIR | TerraScan | 12 | Burned High Regen | 0.48 | 0.04 | 0.16 | 0.17 |
| SWIR | TerraScan | 12 | Burned Low Regen  | 0.48 | 0.08 | 0.09 | 0.12 |
| SWIR | TerraScan | 12 | Road              | 0.48 | 0.01 | 0.05 | 0.05 |
| SWIR | TerraScan | 12 | Unburned          | 0.48 | 0.03 | 0.19 | 0.19 |
| SWIR | TerraScan | 13 | Burned            | 0.48 | 0.06 | 0.13 | 0.14 |
| SWIR | TerraScan | 13 | Burned High Regen | 0.48 | 0.04 | 0.16 | 0.17 |
| SWIR | TerraScan | 13 | Burned Low Regen  | 0.48 | 0.08 | 0.09 | 0.12 |
| SWIR | TerraScan | 13 | Road              | 0.48 | 0.01 | 0.05 | 0.05 |
| SWIR | TerraScan | 13 | Unburned          | 0.48 | 0.03 | 0.19 | 0.19 |
| SWIR | TerraScan | 15 | Burned            | 0.78 | 0.04 | 0.13 | 0.14 |
| SWIR | TerraScan | 15 | Burned High Regen | 0.78 | 0.01 | 0.17 | 0.17 |
| SWIR | TerraScan | 15 | Burned Low Regen  | 0.78 | 0.06 | 0.09 | 0.11 |
| SWIR | TerraScan | 15 | Road              | 0.78 | 0.01 | 0.05 | 0.05 |
| SWIR | TerraScan | 15 | Unburned          | 0.78 | 0.06 | 0.19 | 0.20 |
| SWIR | TerraScan | 16 | Burned            | 0.78 | 0.04 | 0.13 | 0.14 |
| SWIR | TerraScan | 16 | Burned High Regen | 0.78 | 0.01 | 0.17 | 0.17 |
| SWIR | TerraScan | 16 | Burned Low Regen  | 0.78 | 0.06 | 0.09 | 0.11 |
| SWIR | TerraScan | 16 | Road              | 0.78 | 0.01 | 0.05 | 0.05 |
| SWIR | TerraScan | 16 | Unburned          | 0.78 | 0.06 | 0.19 | 0.20 |
| SWIR | TerraScan | 17 | Burned            | 0.78 | 0.04 | 0.13 | 0.14 |
| SWIR | TerraScan | 17 | Burned High Regen | 0.78 | 0.01 | 0.17 | 0.17 |
| SWIR | TerraScan | 17 | Burned Low Regen  | 0.78 | 0.06 | 0.09 | 0.11 |
| SWIR | TerraScan | 17 | Road              | 0.78 | 0.01 | 0.05 | 0.05 |

|            |           |    |                   |      |      |      |      |
|------------|-----------|----|-------------------|------|------|------|------|
| SWIR       | TerraScan | 17 | Unburned          | 0.78 | 0.06 | 0.19 | 0.20 |
| SWIR       | TerraScan | 18 | Burned            | 0.78 | 0.04 | 0.13 | 0.14 |
| SWIR       | TerraScan | 18 | Burned High Regen | 0.78 | 0.01 | 0.17 | 0.17 |
| SWIR       | TerraScan | 18 | Burned Low Regen  | 0.78 | 0.06 | 0.09 | 0.11 |
| SWIR       | TerraScan | 18 | Road              | 0.78 | 0.01 | 0.05 | 0.05 |
| SWIR       | TerraScan | 18 | Unburned          | 0.78 | 0.06 | 0.19 | 0.20 |
| SWIR       | TerraScan | 20 | Burned            | 1.07 | 0.01 | 0.13 | 0.14 |
| SWIR       | TerraScan | 20 | Burned High Regen | 1.07 | 0.01 | 0.17 | 0.17 |
| SWIR       | TerraScan | 20 | Burned Low Regen  | 1.07 | 0.04 | 0.09 | 0.10 |
| SWIR       | TerraScan | 20 | Road              | 1.07 | 0.01 | 0.05 | 0.05 |
| SWIR       | TerraScan | 20 | Unburned          | 1.07 | 0.09 | 0.19 | 0.21 |
| SWIR       | TerraScan | 21 | Burned            | 1.07 | 0.01 | 0.13 | 0.13 |
| SWIR       | TerraScan | 21 | Burned High Regen | 1.07 | 0.01 | 0.17 | 0.17 |
| SWIR       | TerraScan | 21 | Burned Low Regen  | 1.07 | 0.04 | 0.09 | 0.10 |
| SWIR       | TerraScan | 21 | Road              | 1.07 | 0.01 | 0.05 | 0.05 |
| SWIR       | TerraScan | 21 | Unburned          | 1.07 | 0.09 | 0.19 | 0.21 |
| SWIR       | TerraScan | 22 | Burned            | 1.07 | 0.02 | 0.13 | 0.13 |
| SWIR       | TerraScan | 22 | Burned High Regen | 1.07 | 0.01 | 0.17 | 0.17 |
| SWIR       | TerraScan | 22 | Burned Low Regen  | 1.07 | 0.04 | 0.09 | 0.10 |
| SWIR       | TerraScan | 22 | Road              | 1.07 | 0.01 | 0.05 | 0.05 |
| SWIR       | TerraScan | 22 | Unburned          | 1.07 | 0.09 | 0.19 | 0.21 |
| SWIR       | TerraScan | 23 | Burned            | 1.07 | 0.02 | 0.13 | 0.13 |
| SWIR       | TerraScan | 23 | Burned High Regen | 1.07 | 0.01 | 0.17 | 0.17 |
| SWIR       | TerraScan | 23 | Burned Low Regen  | 1.07 | 0.04 | 0.09 | 0.10 |
| SWIR       | TerraScan | 23 | Road              | 1.07 | 0.01 | 0.05 | 0.05 |
| SWIR       | TerraScan | 23 | Unburned          | 1.07 | 0.09 | 0.19 | 0.21 |
| SWIR       | TerraScan | 25 | Burned            | 1.23 | 0.00 | 0.14 | 0.14 |
| SWIR       | TerraScan | 25 | Burned High Regen | 1.23 | 0.03 | 0.17 | 0.18 |
| SWIR       | TerraScan | 25 | Burned Low Regen  | 1.23 | 0.03 | 0.09 | 0.10 |
| SWIR       | TerraScan | 25 | Road              | 1.23 | 0.01 | 0.05 | 0.05 |
| SWIR       | TerraScan | 25 | Unburned          | 1.23 | 0.10 | 0.19 | 0.22 |
| SWIR       | TerraScan | 26 | Burned            | 1.23 | 0.00 | 0.14 | 0.14 |
| SWIR       | TerraScan | 26 | Burned High Regen | 1.23 | 0.03 | 0.17 | 0.17 |
| SWIR       | TerraScan | 26 | Burned Low Regen  | 1.23 | 0.03 | 0.09 | 0.10 |
| SWIR       | TerraScan | 26 | Road              | 1.23 | 0.01 | 0.05 | 0.05 |
| SWIR       | TerraScan | 26 | Unburned          | 1.23 | 0.10 | 0.19 | 0.21 |
| SWIR       | TerraScan | 27 | Burned            | 1.23 | 0.00 | 0.14 | 0.14 |
| SWIR       | TerraScan | 27 | Burned High Regen | 1.23 | 0.03 | 0.17 | 0.17 |
| SWIR       | TerraScan | 27 | Burned Low Regen  | 1.23 | 0.03 | 0.09 | 0.10 |
| SWIR       | TerraScan | 27 | Road              | 1.23 | 0.01 | 0.05 | 0.05 |
| SWIR       | TerraScan | 27 | Unburned          | 1.23 | 0.10 | 0.19 | 0.21 |
| SWIR       | TerraScan | 28 | Burned            | 1.23 | 0.00 | 0.14 | 0.14 |
| SWIR       | TerraScan | 28 | Burned High Regen | 1.23 | 0.03 | 0.17 | 0.17 |
| SWIR       | TerraScan | 28 | Burned Low Regen  | 1.23 | 0.03 | 0.09 | 0.10 |
| SWIR       | TerraScan | 28 | Road              | 1.23 | 0.01 | 0.05 | 0.05 |
| SWIR       | TerraScan | 28 | Unburned          | 1.23 | 0.10 | 0.19 | 0.21 |
| SWIR & NIR | TerraScan | 9  | Burned            | 0.59 | 0.07 | 0.13 | 0.15 |
| SWIR & NIR | TerraScan | 9  | Burned High Regen | 0.59 | 0.05 | 0.17 | 0.17 |
| SWIR & NIR | TerraScan | 9  | Burned Low Regen  | 0.59 | 0.09 | 0.10 | 0.14 |
| SWIR & NIR | TerraScan | 9  | Road              | 0.59 | 0.02 | 0.05 | 0.05 |
| SWIR & NIR | TerraScan | 9  | Unburned          | 0.59 | 0.01 | 0.20 | 0.19 |

|            |           |    |                   |      |      |      |      |
|------------|-----------|----|-------------------|------|------|------|------|
| SWIR & NIR | TerraScan | 14 | Burned            | 1.03 | 0.04 | 0.13 | 0.14 |
| SWIR & NIR | TerraScan | 14 | Burned High Regen | 1.03 | 0.02 | 0.16 | 0.16 |
| SWIR & NIR | TerraScan | 14 | Burned Low Regen  | 1.03 | 0.07 | 0.10 | 0.12 |
| SWIR & NIR | TerraScan | 14 | Road              | 1.03 | 0.01 | 0.05 | 0.05 |
| SWIR & NIR | TerraScan | 14 | Unburned          | 1.03 | 0.05 | 0.19 | 0.20 |
| SWIR & NIR | TerraScan | 19 | Burned            | 1.54 | 0.02 | 0.13 | 0.13 |
| SWIR & NIR | TerraScan | 19 | Burned High Regen | 1.54 | 0.00 | 0.17 | 0.17 |
| SWIR & NIR | TerraScan | 19 | Burned Low Regen  | 1.54 | 0.05 | 0.09 | 0.10 |
| SWIR & NIR | TerraScan | 19 | Road              | 1.54 | 0.01 | 0.05 | 0.05 |
| SWIR & NIR | TerraScan | 19 | Unburned          | 1.54 | 0.08 | 0.19 | 0.20 |
| SWIR & NIR | TerraScan | 24 | Burned            | 1.88 | 0.01 | 0.13 | 0.13 |
| SWIR & NIR | TerraScan | 24 | Burned High Regen | 1.88 | 0.02 | 0.17 | 0.17 |
| SWIR & NIR | TerraScan | 24 | Burned Low Regen  | 1.88 | 0.04 | 0.09 | 0.10 |
| SWIR & NIR | TerraScan | 24 | Road              | 1.88 | 0.00 | 0.04 | 0.04 |
| SWIR & NIR | TerraScan | 24 | Unburned          | 1.88 | 0.09 | 0.19 | 0.21 |
| SWIR & NIR | TerraScan | 1  | Burned            | 1.15 | 0.04 | 0.13 | 0.14 |
| SWIR & NIR | TerraScan | 1  | Burned High Regen | 1.15 | 0.01 | 0.16 | 0.16 |
| SWIR & NIR | TerraScan | 1  | Burned Low Regen  | 1.15 | 0.06 | 0.10 | 0.11 |
| SWIR & NIR | TerraScan | 1  | Road              | 1.15 | 0.00 | 0.04 | 0.04 |
| SWIR & NIR | TerraScan | 1  | Unburned          | 1.15 | 0.06 | 0.19 | 0.20 |
| SWIR & NIR | TerraScan | 2  | Burned            | 1.15 | 0.04 | 0.13 | 0.14 |
| SWIR & NIR | TerraScan | 2  | Burned High Regen | 1.15 | 0.01 | 0.16 | 0.16 |
| SWIR & NIR | TerraScan | 2  | Burned Low Regen  | 1.15 | 0.06 | 0.10 | 0.11 |
| SWIR & NIR | TerraScan | 2  | Road              | 1.15 | 0.00 | 0.04 | 0.04 |
| SWIR & NIR | TerraScan | 2  | Unburned          | 1.15 | 0.06 | 0.19 | 0.20 |
| SWIR & NIR | TerraScan | 3  | Burned            | 1.15 | 0.04 | 0.13 | 0.14 |
| SWIR & NIR | TerraScan | 3  | Burned High Regen | 1.15 | 0.01 | 0.16 | 0.16 |
| SWIR & NIR | TerraScan | 3  | Burned Low Regen  | 1.15 | 0.06 | 0.10 | 0.11 |
| SWIR & NIR | TerraScan | 3  | Road              | 1.15 | 0.00 | 0.04 | 0.04 |
| SWIR & NIR | TerraScan | 3  | Unburned          | 1.15 | 0.06 | 0.19 | 0.20 |
| SWIR & NIR | TerraScan | 4  | Burned            | 1.15 | 0.04 | 0.13 | 0.14 |
| SWIR & NIR | TerraScan | 4  | Burned High Regen | 1.15 | 0.01 | 0.16 | 0.16 |
| SWIR & NIR | TerraScan | 4  | Burned Low Regen  | 1.15 | 0.06 | 0.10 | 0.11 |
| SWIR & NIR | TerraScan | 4  | Road              | 1.15 | 0.00 | 0.04 | 0.04 |
| SWIR & NIR | TerraScan | 4  | Unburned          | 1.15 | 0.06 | 0.19 | 0.20 |
| SWIR & NIR | TerraScan | 5  | Burned            | 1.15 | 0.04 | 0.13 | 0.14 |
| SWIR & NIR | TerraScan | 5  | Burned High Regen | 1.15 | 0.01 | 0.16 | 0.16 |
| SWIR & NIR | TerraScan | 5  | Burned Low Regen  | 1.15 | 0.06 | 0.10 | 0.11 |
| SWIR & NIR | TerraScan | 5  | Road              | 1.15 | 0.00 | 0.04 | 0.04 |
| SWIR & NIR | TerraScan | 5  | Unburned          | 1.15 | 0.06 | 0.19 | 0.20 |
| SWIR & NIR | TerraScan | 6  | Burned            | 1.15 | 0.04 | 0.13 | 0.14 |
| SWIR & NIR | TerraScan | 6  | Burned High Regen | 1.15 | 0.01 | 0.16 | 0.16 |
| SWIR & NIR | TerraScan | 6  | Burned Low Regen  | 1.15 | 0.06 | 0.10 | 0.11 |
| SWIR & NIR | TerraScan | 6  | Road              | 1.15 | 0.00 | 0.04 | 0.04 |
| SWIR & NIR | TerraScan | 6  | Unburned          | 1.15 | 0.06 | 0.19 | 0.20 |
| SWIR & NIR | TerraScan | 7  | Burned            | 1.15 | 0.04 | 0.13 | 0.14 |
| SWIR & NIR | TerraScan | 7  | Burned High Regen | 1.15 | 0.01 | 0.16 | 0.16 |
| SWIR & NIR | TerraScan | 7  | Burned Low Regen  | 1.15 | 0.06 | 0.10 | 0.11 |
| SWIR & NIR | TerraScan | 7  | Road              | 1.15 | 0.00 | 0.04 | 0.04 |
| SWIR & NIR | TerraScan | 7  | Unburned          | 1.15 | 0.06 | 0.19 | 0.20 |
| SWIR & NIR | TerraScan | 8  | Burned            | 1.15 | 0.04 | 0.13 | 0.14 |

|            |           |    |                   |      |      |      |      |
|------------|-----------|----|-------------------|------|------|------|------|
| SWIR & NIR | TerraScan | 8  | Burned High Regen | 1.15 | 0.01 | 0.16 | 0.16 |
| SWIR & NIR | TerraScan | 8  | Burned Low Regen  | 1.15 | 0.06 | 0.10 | 0.11 |
| SWIR & NIR | TerraScan | 8  | Road              | 1.15 | 0.00 | 0.04 | 0.04 |
| SWIR & NIR | TerraScan | 8  | Unburned          | 1.15 | 0.06 | 0.19 | 0.20 |
| SWIR & NIR | TerraScan | 10 | Burned            | 0.59 | 0.07 | 0.13 | 0.15 |
| SWIR & NIR | TerraScan | 10 | Burned High Regen | 0.59 | 0.05 | 0.17 | 0.17 |
| SWIR & NIR | TerraScan | 10 | Burned Low Regen  | 0.59 | 0.09 | 0.10 | 0.14 |
| SWIR & NIR | TerraScan | 10 | Road              | 0.59 | 0.02 | 0.05 | 0.05 |
| SWIR & NIR | TerraScan | 10 | Unburned          | 0.59 | 0.01 | 0.19 | 0.19 |
| SWIR & NIR | TerraScan | 11 | Burned            | 0.59 | 0.07 | 0.13 | 0.15 |
| SWIR & NIR | TerraScan | 11 | Burned High Regen | 0.59 | 0.05 | 0.17 | 0.17 |
| SWIR & NIR | TerraScan | 11 | Burned Low Regen  | 0.59 | 0.09 | 0.10 | 0.14 |
| SWIR & NIR | TerraScan | 11 | Road              | 0.59 | 0.02 | 0.05 | 0.05 |
| SWIR & NIR | TerraScan | 11 | Unburned          | 0.59 | 0.01 | 0.20 | 0.19 |
| SWIR & NIR | TerraScan | 12 | Burned            | 0.59 | 0.07 | 0.13 | 0.15 |
| SWIR & NIR | TerraScan | 12 | Burned High Regen | 0.59 | 0.05 | 0.17 | 0.17 |
| SWIR & NIR | TerraScan | 12 | Burned Low Regen  | 0.59 | 0.09 | 0.10 | 0.14 |
| SWIR & NIR | TerraScan | 12 | Road              | 0.59 | 0.02 | 0.05 | 0.05 |
| SWIR & NIR | TerraScan | 12 | Unburned          | 0.59 | 0.01 | 0.20 | 0.19 |
| SWIR & NIR | TerraScan | 13 | Burned            | 0.59 | 0.07 | 0.13 | 0.15 |
| SWIR & NIR | TerraScan | 13 | Burned High Regen | 0.59 | 0.05 | 0.17 | 0.17 |
| SWIR & NIR | TerraScan | 13 | Burned Low Regen  | 0.59 | 0.09 | 0.10 | 0.14 |
| SWIR & NIR | TerraScan | 13 | Road              | 0.59 | 0.02 | 0.05 | 0.05 |
| SWIR & NIR | TerraScan | 13 | Unburned          | 0.59 | 0.01 | 0.20 | 0.19 |
| SWIR & NIR | TerraScan | 15 | Burned            | 1.04 | 0.04 | 0.13 | 0.14 |
| SWIR & NIR | TerraScan | 15 | Burned High Regen | 1.04 | 0.02 | 0.16 | 0.16 |
| SWIR & NIR | TerraScan | 15 | Burned Low Regen  | 1.04 | 0.07 | 0.10 | 0.12 |
| SWIR & NIR | TerraScan | 15 | Road              | 1.04 | 0.01 | 0.05 | 0.05 |
| SWIR & NIR | TerraScan | 15 | Unburned          | 1.04 | 0.05 | 0.19 | 0.20 |
| SWIR & NIR | TerraScan | 16 | Burned            | 1.03 | 0.04 | 0.14 | 0.13 |
| SWIR & NIR | TerraScan | 16 | Burned High Regen | 1.03 | 0.02 | 0.16 | 0.16 |
| SWIR & NIR | TerraScan | 16 | Burned Low Regen  | 1.03 | 0.07 | 0.10 | 0.12 |
| SWIR & NIR | TerraScan | 16 | Road              | 1.03 | 0.01 | 0.05 | 0.05 |
| SWIR & NIR | TerraScan | 16 | Unburned          | 1.03 | 0.05 | 0.19 | 0.20 |
| SWIR & NIR | TerraScan | 17 | Burned            | 1.03 | 0.04 | 0.13 | 0.14 |
| SWIR & NIR | TerraScan | 17 | Burned High Regen | 1.03 | 0.02 | 0.16 | 0.16 |
| SWIR & NIR | TerraScan | 17 | Burned Low Regen  | 1.03 | 0.07 | 0.10 | 0.12 |
| SWIR & NIR | TerraScan | 17 | Road              | 1.03 | 0.01 | 0.05 | 0.05 |
| SWIR & NIR | TerraScan | 17 | Unburned          | 1.03 | 0.05 | 0.19 | 0.20 |
| SWIR & NIR | TerraScan | 18 | Burned            | 1.03 | 0.04 | 0.13 | 0.14 |
| SWIR & NIR | TerraScan | 18 | Burned High Regen | 1.03 | 0.02 | 0.16 | 0.16 |
| SWIR & NIR | TerraScan | 18 | Burned Low Regen  | 1.03 | 0.07 | 0.10 | 0.12 |
| SWIR & NIR | TerraScan | 18 | Road              | 1.03 | 0.01 | 0.05 | 0.05 |
| SWIR & NIR | TerraScan | 18 | Unburned          | 1.03 | 0.05 | 0.19 | 0.20 |
| SWIR & NIR | TerraScan | 20 | Burned            | 1.54 | 0.02 | 0.13 | 0.13 |
| SWIR & NIR | TerraScan | 20 | Burned High Regen | 1.54 | 0.00 | 0.17 | 0.16 |
| SWIR & NIR | TerraScan | 20 | Burned Low Regen  | 1.54 | 0.05 | 0.09 | 0.10 |
| SWIR & NIR | TerraScan | 20 | Road              | 1.54 | 0.00 | 0.04 | 0.04 |
| SWIR & NIR | TerraScan | 20 | Unburned          | 1.54 | 0.08 | 0.19 | 0.20 |
| SWIR & NIR | TerraScan | 21 | Burned            | 1.54 | 0.02 | 0.13 | 0.13 |
| SWIR & NIR | TerraScan | 21 | Burned High Regen | 1.54 | 0.00 | 0.17 | 0.17 |

|                     |           |    |                   |      |      |      |      |
|---------------------|-----------|----|-------------------|------|------|------|------|
| SWIR & NIR          | TerraScan | 21 | Burned Low Regen  | 1.54 | 0.05 | 0.09 | 0.10 |
| SWIR & NIR          | TerraScan | 21 | Road              | 1.54 | 0.01 | 0.05 | 0.05 |
| SWIR & NIR          | TerraScan | 21 | Unburned          | 1.54 | 0.08 | 0.19 | 0.20 |
| SWIR & NIR          | TerraScan | 22 | Burned            | 1.54 | 0.02 | 0.13 | 0.13 |
| SWIR & NIR          | TerraScan | 22 | Burned High Regen | 1.54 | 0.00 | 0.17 | 0.17 |
| SWIR & NIR          | TerraScan | 22 | Burned Low Regen  | 1.54 | 0.05 | 0.09 | 0.10 |
| SWIR & NIR          | TerraScan | 22 | Road              | 1.54 | 0.01 | 0.05 | 0.05 |
| SWIR & NIR          | TerraScan | 22 | Unburned          | 1.54 | 0.08 | 0.19 | 0.20 |
| SWIR & NIR          | TerraScan | 23 | Burned            | 1.54 | 0.02 | 0.13 | 0.13 |
| SWIR & NIR          | TerraScan | 23 | Burned High Regen | 1.54 | 0.00 | 0.17 | 0.17 |
| SWIR & NIR          | TerraScan | 23 | Burned Low Regen  | 1.54 | 0.05 | 0.09 | 0.10 |
| SWIR & NIR          | TerraScan | 23 | Road              | 1.54 | 0.01 | 0.05 | 0.05 |
| SWIR & NIR          | TerraScan | 23 | Unburned          | 1.54 | 0.08 | 0.19 | 0.20 |
| SWIR & NIR          | TerraScan | 25 | Burned            | 1.88 | 0.00 | 0.13 | 0.13 |
| SWIR & NIR          | TerraScan | 25 | Burned High Regen | 1.88 | 0.02 | 0.17 | 0.17 |
| SWIR & NIR          | TerraScan | 25 | Burned Low Regen  | 1.88 | 0.04 | 0.09 | 0.10 |
| SWIR & NIR          | TerraScan | 25 | Road              | 1.88 | 0.00 | 0.04 | 0.04 |
| SWIR & NIR          | TerraScan | 25 | Unburned          | 1.88 | 0.09 | 0.19 | 0.21 |
| SWIR & NIR          | TerraScan | 26 | Burned            | 1.88 | 0.00 | 0.13 | 0.13 |
| SWIR & NIR          | TerraScan | 26 | Burned High Regen | 1.88 | 0.02 | 0.17 | 0.17 |
| SWIR & NIR          | TerraScan | 26 | Burned Low Regen  | 1.88 | 0.04 | 0.09 | 0.10 |
| SWIR & NIR          | TerraScan | 26 | Road              | 1.88 | 0.00 | 0.04 | 0.04 |
| SWIR & NIR          | TerraScan | 26 | Unburned          | 1.88 | 0.09 | 0.19 | 0.21 |
| SWIR & NIR          | TerraScan | 27 | Burned            | 1.88 | 0.01 | 0.13 | 0.13 |
| SWIR & NIR          | TerraScan | 27 | Burned High Regen | 1.88 | 0.02 | 0.17 | 0.17 |
| SWIR & NIR          | TerraScan | 27 | Burned Low Regen  | 1.88 | 0.04 | 0.09 | 0.10 |
| SWIR & NIR          | TerraScan | 27 | Road              | 1.88 | 0.00 | 0.04 | 0.04 |
| SWIR & NIR          | TerraScan | 27 | Unburned          | 1.88 | 0.09 | 0.19 | 0.21 |
| SWIR & NIR          | TerraScan | 28 | Burned            | 1.88 | 0.01 | 0.13 | 0.13 |
| SWIR & NIR          | TerraScan | 28 | Burned High Regen | 1.88 | 0.02 | 0.17 | 0.17 |
| SWIR & NIR          | TerraScan | 28 | Burned Low Regen  | 1.88 | 0.04 | 0.09 | 0.10 |
| SWIR & NIR          | TerraScan | 28 | Road              | 1.88 | 0.00 | 0.04 | 0.04 |
| SWIR & NIR          | TerraScan | 28 | Unburned          | 1.88 | 0.09 | 0.19 | 0.21 |
| SWIR, NIR & Visible | TerraScan | 9  | Burned            | 0.64 | 0.07 | 0.13 | 0.15 |
| SWIR, NIR & Visible | TerraScan | 9  | Burned High Regen | 0.64 | 0.05 | 0.17 | 0.17 |
| SWIR, NIR & Visible | TerraScan | 9  | Burned Low Regen  | 0.64 | 0.09 | 0.10 | 0.14 |
| SWIR, NIR & Visible | TerraScan | 9  | Road              | 0.64 | 0.01 | 0.04 | 0.05 |
| SWIR, NIR & Visible | TerraScan | 9  | Unburned          | 0.64 | 0.01 | 0.19 | 0.19 |
| SWIR, NIR & Visible | TerraScan | 14 | Burned            | 1.16 | 0.04 | 0.13 | 0.14 |
| SWIR, NIR & Visible | TerraScan | 14 | Burned High Regen | 1.16 | 0.02 | 0.16 | 0.17 |
| SWIR, NIR & Visible | TerraScan | 14 | Burned Low Regen  | 1.16 | 0.07 | 0.10 | 0.12 |
| SWIR, NIR & Visible | TerraScan | 14 | Road              | 1.16 | 0.01 | 0.04 | 0.05 |

|                     |           |    |                   |      |      |      |      |
|---------------------|-----------|----|-------------------|------|------|------|------|
| SWIR, NIR & Visible | TerraScan | 14 | Unburned          | 1.16 | 0.05 | 0.19 | 0.19 |
| SWIR, NIR & Visible | TerraScan | 19 | Burned            | 1.80 | 0.02 | 0.13 | 0.13 |
| SWIR, NIR & Visible | TerraScan | 19 | Burned High Regen | 1.80 | 0.01 | 0.17 | 0.17 |
| SWIR, NIR & Visible | TerraScan | 19 | Burned Low Regen  | 1.80 | 0.04 | 0.09 | 0.10 |
| SWIR, NIR & Visible | TerraScan | 19 | Road              | 1.80 | 0.01 | 0.05 | 0.05 |
| SWIR, NIR & Visible | TerraScan | 19 | Unburned          | 1.80 | 0.08 | 0.19 | 0.20 |
| SWIR, NIR & Visible | TerraScan | 24 | Burned            | 2.27 | 0.00 | 0.14 | 0.14 |
| SWIR, NIR & Visible | TerraScan | 24 | Burned High Regen | 2.27 | 0.03 | 0.17 | 0.18 |
| SWIR, NIR & Visible | TerraScan | 24 | Burned Low Regen  | 2.27 | 0.03 | 0.09 | 0.10 |
| SWIR, NIR & Visible | TerraScan | 24 | Road              | 2.27 | 0.01 | 0.05 | 0.05 |
| SWIR, NIR & Visible | TerraScan | 24 | Unburned          | 2.27 | 0.09 | 0.19 | 0.21 |
| SWIR, NIR & Visible | TerraScan | 1  | Burned            | 1.31 | 0.03 | 0.13 | 0.14 |
| SWIR, NIR & Visible | TerraScan | 1  | Burned High Regen | 1.31 | 0.01 | 0.17 | 0.17 |
| SWIR, NIR & Visible | TerraScan | 1  | Burned Low Regen  | 1.31 | 0.06 | 0.10 | 0.11 |
| SWIR, NIR & Visible | TerraScan | 1  | Road              | 1.31 | 0.01 | 0.04 | 0.05 |
| SWIR, NIR & Visible | TerraScan | 1  | Unburned          | 1.31 | 0.06 | 0.19 | 0.20 |
| SWIR, NIR & Visible | TerraScan | 2  | Burned            | 1.31 | 0.03 | 0.13 | 0.14 |
| SWIR, NIR & Visible | TerraScan | 2  | Burned High Regen | 1.31 | 0.01 | 0.17 | 0.17 |
| SWIR, NIR & Visible | TerraScan | 2  | Burned Low Regen  | 1.31 | 0.06 | 0.10 | 0.11 |
| SWIR, NIR & Visible | TerraScan | 2  | Road              | 1.31 | 0.01 | 0.04 | 0.05 |
| SWIR, NIR & Visible | TerraScan | 2  | Unburned          | 1.31 | 0.06 | 0.19 | 0.20 |
| SWIR, NIR & Visible | TerraScan | 3  | Burned            | 1.31 | 0.03 | 0.13 | 0.14 |
| SWIR, NIR & Visible | TerraScan | 3  | Burned High Regen | 1.31 | 0.01 | 0.17 | 0.17 |
| SWIR, NIR & Visible | TerraScan | 3  | Burned Low Regen  | 1.31 | 0.06 | 0.10 | 0.11 |
| SWIR, NIR & Visible | TerraScan | 3  | Road              | 1.31 | 0.01 | 0.04 | 0.05 |
| SWIR, NIR & Visible | TerraScan | 3  | Unburned          | 1.31 | 0.06 | 0.19 | 0.20 |

|                     |           |    |                   |      |      |      |      |
|---------------------|-----------|----|-------------------|------|------|------|------|
| SWIR, NIR & Visible | TerraScan | 4  | Burned            | 1.31 | 0.03 | 0.13 | 0.14 |
| SWIR, NIR & Visible | TerraScan | 4  | Burned High Regen | 1.31 | 0.01 | 0.17 | 0.17 |
| SWIR, NIR & Visible | TerraScan | 4  | Burned Low Regen  | 1.31 | 0.06 | 0.10 | 0.11 |
| SWIR, NIR & Visible | TerraScan | 4  | Road              | 1.31 | 0.01 | 0.04 | 0.05 |
| SWIR, NIR & Visible | TerraScan | 4  | Unburned          | 1.31 | 0.06 | 0.19 | 0.20 |
| SWIR, NIR & Visible | TerraScan | 5  | Burned            | 1.31 | 0.03 | 0.13 | 0.14 |
| SWIR, NIR & Visible | TerraScan | 5  | Burned High Regen | 1.31 | 0.01 | 0.17 | 0.17 |
| SWIR, NIR & Visible | TerraScan | 5  | Burned Low Regen  | 1.31 | 0.06 | 0.10 | 0.11 |
| SWIR, NIR & Visible | TerraScan | 5  | Road              | 1.31 | 0.01 | 0.04 | 0.05 |
| SWIR, NIR & Visible | TerraScan | 5  | Unburned          | 1.31 | 0.06 | 0.19 | 0.20 |
| SWIR, NIR & Visible | TerraScan | 6  | Burned            | 1.31 | 0.03 | 0.13 | 0.14 |
| SWIR, NIR & Visible | TerraScan | 6  | Burned High Regen | 1.31 | 0.01 | 0.17 | 0.17 |
| SWIR, NIR & Visible | TerraScan | 6  | Burned Low Regen  | 1.31 | 0.06 | 0.10 | 0.11 |
| SWIR, NIR & Visible | TerraScan | 6  | Road              | 1.31 | 0.01 | 0.04 | 0.05 |
| SWIR, NIR & Visible | TerraScan | 6  | Unburned          | 1.31 | 0.06 | 0.19 | 0.20 |
| SWIR, NIR & Visible | TerraScan | 7  | Burned            | 1.31 | 0.03 | 0.13 | 0.14 |
| SWIR, NIR & Visible | TerraScan | 7  | Burned High Regen | 1.31 | 0.01 | 0.17 | 0.17 |
| SWIR, NIR & Visible | TerraScan | 7  | Burned Low Regen  | 1.31 | 0.06 | 0.10 | 0.11 |
| SWIR, NIR & Visible | TerraScan | 7  | Road              | 1.31 | 0.01 | 0.04 | 0.05 |
| SWIR, NIR & Visible | TerraScan | 7  | Unburned          | 1.31 | 0.06 | 0.19 | 0.20 |
| SWIR, NIR & Visible | TerraScan | 8  | Burned            | 1.31 | 0.03 | 0.13 | 0.14 |
| SWIR, NIR & Visible | TerraScan | 8  | Burned High Regen | 1.31 | 0.01 | 0.17 | 0.17 |
| SWIR, NIR & Visible | TerraScan | 8  | Burned Low Regen  | 1.31 | 0.06 | 0.10 | 0.11 |
| SWIR, NIR & Visible | TerraScan | 8  | Road              | 1.31 | 0.01 | 0.04 | 0.05 |
| SWIR, NIR & Visible | TerraScan | 8  | Unburned          | 1.31 | 0.06 | 0.19 | 0.20 |
| SWIR, NIR & Visible | TerraScan | 10 | Burned            | 0.64 | 0.07 | 0.13 | 0.15 |



|                     |           |    |                   |      |      |      |      |
|---------------------|-----------|----|-------------------|------|------|------|------|
| SWIR, NIR & Visible | TerraScan | 10 | Burned High Regen | 0.64 | 0.05 | 0.17 | 0.17 |
| SWIR, NIR & Visible | TerraScan | 10 | Burned Low Regen  | 0.64 | 0.09 | 0.10 | 0.14 |
| SWIR, NIR & Visible | TerraScan | 10 | Road              | 0.64 | 0.01 | 0.04 | 0.05 |
| SWIR, NIR & Visible | TerraScan | 10 | Unburned          | 0.64 | 0.01 | 0.19 | 0.19 |
| SWIR, NIR & Visible | TerraScan | 11 | Burned            | 0.64 | 0.07 | 0.13 | 0.15 |
| SWIR, NIR & Visible | TerraScan | 11 | Burned High Regen | 0.64 | 0.05 | 0.17 | 0.17 |
| SWIR, NIR & Visible | TerraScan | 11 | Burned Low Regen  | 0.64 | 0.09 | 0.10 | 0.14 |
| SWIR, NIR & Visible | TerraScan | 11 | Road              | 0.64 | 0.01 | 0.04 | 0.05 |
| SWIR, NIR & Visible | TerraScan | 11 | Unburned          | 0.64 | 0.01 | 0.20 | 0.19 |
| SWIR, NIR & Visible | TerraScan | 12 | Burned            | 0.64 | 0.07 | 0.13 | 0.15 |
| SWIR, NIR & Visible | TerraScan | 12 | Burned High Regen | 0.64 | 0.05 | 0.17 | 0.17 |
| SWIR, NIR & Visible | TerraScan | 12 | Burned Low Regen  | 0.64 | 0.09 | 0.10 | 0.14 |
| SWIR, NIR & Visible | TerraScan | 12 | Road              | 0.64 | 0.01 | 0.04 | 0.05 |
| SWIR, NIR & Visible | TerraScan | 12 | Unburned          | 0.64 | 0.01 | 0.19 | 0.19 |
| SWIR, NIR & Visible | TerraScan | 13 | Burned            | 0.64 | 0.07 | 0.13 | 0.15 |
| SWIR, NIR & Visible | TerraScan | 13 | Burned High Regen | 0.64 | 0.05 | 0.17 | 0.17 |
| SWIR, NIR & Visible | TerraScan | 13 | Burned Low Regen  | 0.64 | 0.09 | 0.10 | 0.14 |
| SWIR, NIR & Visible | TerraScan | 13 | Road              | 0.64 | 0.01 | 0.04 | 0.05 |
| SWIR, NIR & Visible | TerraScan | 13 | Unburned          | 0.64 | 0.01 | 0.19 | 0.19 |
| SWIR, NIR & Visible | TerraScan | 15 | Burned            | 1.17 | 0.04 | 0.13 | 0.14 |
| SWIR, NIR & Visible | TerraScan | 15 | Burned High Regen | 1.17 | 0.02 | 0.17 | 0.17 |
| SWIR, NIR & Visible | TerraScan | 15 | Burned Low Regen  | 1.17 | 0.07 | 0.10 | 0.12 |
| SWIR, NIR & Visible | TerraScan | 15 | Road              | 1.17 | 0.01 | 0.04 | 0.05 |
| SWIR, NIR & Visible | TerraScan | 15 | Unburned          | 1.17 | 0.05 | 0.19 | 0.20 |
| SWIR, NIR & Visible | TerraScan | 16 | Burned            | 1.16 | 0.04 | 0.13 | 0.14 |
| SWIR, NIR & Visible | TerraScan | 16 | Burned High Regen | 1.16 | 0.02 | 0.17 | 0.16 |

|                     |           |    |                   |      |      |      |      |
|---------------------|-----------|----|-------------------|------|------|------|------|
| SWIR, NIR & Visible | TerraScan | 16 | Burned Low Regen  | 1.16 | 0.07 | 0.10 | 0.12 |
| SWIR, NIR & Visible | TerraScan | 16 | Road              | 1.16 | 0.01 | 0.04 | 0.05 |
| SWIR, NIR & Visible | TerraScan | 16 | Unburned          | 1.16 | 0.05 | 0.19 | 0.19 |
| SWIR, NIR & Visible | TerraScan | 17 | Burned            | 1.16 | 0.04 | 0.13 | 0.14 |
| SWIR, NIR & Visible | TerraScan | 17 | Burned High Regen | 1.16 | 0.02 | 0.16 | 0.17 |
| SWIR, NIR & Visible | TerraScan | 17 | Burned Low Regen  | 1.16 | 0.07 | 0.10 | 0.12 |
| SWIR, NIR & Visible | TerraScan | 17 | Road              | 1.16 | 0.01 | 0.04 | 0.05 |
| SWIR, NIR & Visible | TerraScan | 17 | Unburned          | 1.16 | 0.05 | 0.19 | 0.19 |
| SWIR, NIR & Visible | TerraScan | 18 | Burned            | 1.16 | 0.04 | 0.13 | 0.14 |
| SWIR, NIR & Visible | TerraScan | 18 | Burned High Regen | 1.16 | 0.02 | 0.17 | 0.17 |
| SWIR, NIR & Visible | TerraScan | 18 | Burned Low Regen  | 1.16 | 0.07 | 0.10 | 0.12 |
| SWIR, NIR & Visible | TerraScan | 18 | Road              | 1.16 | 0.01 | 0.04 | 0.05 |
| SWIR, NIR & Visible | TerraScan | 18 | Unburned          | 1.16 | 0.05 | 0.19 | 0.19 |
| SWIR, NIR & Visible | TerraScan | 20 | Burned            | 1.81 | 0.02 | 0.13 | 0.13 |
| SWIR, NIR & Visible | TerraScan | 20 | Burned High Regen | 1.81 | 0.01 | 0.17 | 0.17 |
| SWIR, NIR & Visible | TerraScan | 20 | Burned Low Regen  | 1.81 | 0.04 | 0.09 | 0.10 |
| SWIR, NIR & Visible | TerraScan | 20 | Road              | 1.81 | 0.01 | 0.05 | 0.05 |
| SWIR, NIR & Visible | TerraScan | 20 | Unburned          | 1.81 | 0.08 | 0.19 | 0.20 |
| SWIR, NIR & Visible | TerraScan | 21 | Burned            | 1.80 | 0.02 | 0.13 | 0.13 |
| SWIR, NIR & Visible | TerraScan | 21 | Burned High Regen | 1.80 | 0.01 | 0.17 | 0.17 |
| SWIR, NIR & Visible | TerraScan | 21 | Burned Low Regen  | 1.80 | 0.04 | 0.09 | 0.10 |
| SWIR, NIR & Visible | TerraScan | 21 | Road              | 1.80 | 0.01 | 0.05 | 0.05 |
| SWIR, NIR & Visible | TerraScan | 21 | Unburned          | 1.80 | 0.08 | 0.19 | 0.20 |
| SWIR, NIR & Visible | TerraScan | 22 | Burned            | 1.80 | 0.02 | 0.13 | 0.13 |
| SWIR, NIR & Visible | TerraScan | 22 | Burned High Regen | 1.80 | 0.01 | 0.17 | 0.17 |
| SWIR, NIR & Visible | TerraScan | 22 | Burned Low Regen  | 1.80 | 0.04 | 0.09 | 0.10 |

|                     |           |    |                   |      |      |      |      |
|---------------------|-----------|----|-------------------|------|------|------|------|
| SWIR, NIR & Visible | TerraScan | 22 | Road              | 1.80 | 0.01 | 0.05 | 0.05 |
| SWIR, NIR & Visible | TerraScan | 22 | Unburned          | 1.80 | 0.08 | 0.19 | 0.20 |
| SWIR, NIR & Visible | TerraScan | 23 | Burned            | 1.80 | 0.02 | 0.13 | 0.13 |
| SWIR, NIR & Visible | TerraScan | 23 | Burned High Regen | 1.80 | 0.01 | 0.17 | 0.17 |
| SWIR, NIR & Visible | TerraScan | 23 | Burned Low Regen  | 1.80 | 0.04 | 0.09 | 0.10 |
| SWIR, NIR & Visible | TerraScan | 23 | Road              | 1.80 | 0.01 | 0.05 | 0.05 |
| SWIR, NIR & Visible | TerraScan | 23 | Unburned          | 1.80 | 0.08 | 0.19 | 0.20 |
| SWIR, NIR & Visible | TerraScan | 25 | Burned            | 2.27 | 0.00 | 0.14 | 0.14 |
| SWIR, NIR & Visible | TerraScan | 25 | Burned High Regen | 2.27 | 0.03 | 0.17 | 0.18 |
| SWIR, NIR & Visible | TerraScan | 25 | Burned Low Regen  | 2.27 | 0.03 | 0.09 | 0.10 |
| SWIR, NIR & Visible | TerraScan | 25 | Road              | 2.27 | 0.01 | 0.05 | 0.05 |
| SWIR, NIR & Visible | TerraScan | 25 | Unburned          | 2.27 | 0.09 | 0.19 | 0.21 |
| SWIR, NIR & Visible | TerraScan | 26 | Burned            | 2.27 | 0.00 | 0.14 | 0.14 |
| SWIR, NIR & Visible | TerraScan | 26 | Burned High Regen | 2.27 | 0.03 | 0.17 | 0.18 |
| SWIR, NIR & Visible | TerraScan | 26 | Burned Low Regen  | 2.27 | 0.03 | 0.09 | 0.10 |
| SWIR, NIR & Visible | TerraScan | 26 | Road              | 2.27 | 0.01 | 0.05 | 0.05 |
| SWIR, NIR & Visible | TerraScan | 26 | Unburned          | 2.27 | 0.09 | 0.19 | 0.21 |
| SWIR, NIR & Visible | TerraScan | 27 | Burned            | 2.27 | 0.00 | 0.14 | 0.14 |
| SWIR, NIR & Visible | TerraScan | 27 | Burned High Regen | 2.27 | 0.03 | 0.17 | 0.18 |
| SWIR, NIR & Visible | TerraScan | 27 | Burned Low Regen  | 2.27 | 0.03 | 0.09 | 0.10 |
| SWIR, NIR & Visible | TerraScan | 27 | Road              | 2.27 | 0.01 | 0.05 | 0.05 |
| SWIR, NIR & Visible | TerraScan | 27 | Unburned          | 2.27 | 0.09 | 0.19 | 0.21 |
| SWIR, NIR & Visible | TerraScan | 33 | Burned            | 2.26 | 0.00 | 0.14 | 0.14 |
| SWIR, NIR & Visible | TerraScan | 33 | Burned High Regen | 2.26 | 0.03 | 0.17 | 0.18 |
| SWIR, NIR & Visible | TerraScan | 33 | Burned Low Regen  | 2.26 | 0.03 | 0.09 | 0.10 |
| SWIR, NIR & Visible | TerraScan | 33 | Road              | 2.26 | 0.01 | 0.05 | 0.05 |

|                     |           |    |                   |      |      |      |      |
|---------------------|-----------|----|-------------------|------|------|------|------|
| SWIR, NIR & Visible | TerraScan | 33 | Unburned          | 2.26 | 0.09 | 0.19 | 0.21 |
| SWIR, NIR & Visible | TerraScan | 34 | Burned            | 1.05 | 0.03 | 0.13 | 0.13 |
| SWIR, NIR & Visible | TerraScan | 34 | Burned High Regen | 1.05 | 0.00 | 0.17 | 0.17 |
| SWIR, NIR & Visible | TerraScan | 34 | Burned Low Regen  | 1.05 | 0.06 | 0.09 | 0.11 |
| SWIR, NIR & Visible | TerraScan | 34 | Road              | 1.05 | 0.02 | 0.05 | 0.05 |
| SWIR, NIR & Visible | TerraScan | 34 | Unburned          | 1.05 | 0.07 | 0.19 | 0.20 |
| SWIR, NIR & Visible | TerraScan | 35 | Burned            | 0.22 | 0.09 | 0.13 | 0.16 |
| SWIR, NIR & Visible | TerraScan | 35 | Burned High Regen | 0.22 | 0.07 | 0.16 | 0.18 |
| SWIR, NIR & Visible | TerraScan | 35 | Burned Low Regen  | 0.22 | 0.11 | 0.10 | 0.15 |
| SWIR, NIR & Visible | TerraScan | 35 | Road              | 0.22 | 0.02 | 0.04 | 0.05 |
| SWIR, NIR & Visible | TerraScan | 35 | Unburned          | 0.22 | 0.01 | 0.20 | 0.20 |
| SWIR, NIR & Visible | TerraScan | 36 | Burned            | 2.27 | 0.00 | 0.14 | 0.14 |
| SWIR, NIR & Visible | TerraScan | 36 | Burned High Regen | 2.27 | 0.03 | 0.17 | 0.18 |
| SWIR, NIR & Visible | TerraScan | 36 | Burned Low Regen  | 2.27 | 0.03 | 0.09 | 0.10 |
| SWIR, NIR & Visible | TerraScan | 36 | Road              | 2.27 | 0.01 | 0.05 | 0.05 |
| SWIR, NIR & Visible | TerraScan | 36 | Unburned          | 2.27 | 0.09 | 0.19 | 0.21 |
| SWIR, NIR & Visible | TerraScan | 29 | Burned            | 4.06 | 0.04 | 0.14 | 0.15 |
| SWIR, NIR & Visible | TerraScan | 29 | Burned High Regen | 4.06 | 0.07 | 0.17 | 0.19 |
| SWIR, NIR & Visible | TerraScan | 29 | Burned Low Regen  | 4.06 | 0.01 | 0.09 | 0.09 |
| SWIR, NIR & Visible | TerraScan | 29 | Road              | 4.06 | 0.00 | 0.05 | 0.05 |
| SWIR, NIR & Visible | TerraScan | 29 | Unburned          | 4.06 | 0.14 | 0.21 | 0.25 |
| SWIR, NIR & Visible | TerraScan | 30 | Burned            | 3.94 | 0.04 | 0.14 | 0.15 |
| SWIR, NIR & Visible | TerraScan | 30 | Burned High Regen | 3.94 | 0.06 | 0.17 | 0.18 |
| SWIR, NIR & Visible | TerraScan | 30 | Burned Low Regen  | 3.94 | 0.01 | 0.09 | 0.09 |
| SWIR, NIR & Visible | TerraScan | 30 | Road              | 3.94 | 0.00 | 0.05 | 0.05 |
| SWIR, NIR & Visible | TerraScan | 30 | Unburned          | 3.94 | 0.13 | 0.21 | 0.25 |

|                     |           |    |                   |      |      |      |      |
|---------------------|-----------|----|-------------------|------|------|------|------|
| SWIR, NIR & Visible | TerraScan | 31 | Burned            | 3.32 | 0.03 | 0.14 | 0.14 |
| SWIR, NIR & Visible | TerraScan | 31 | Burned High Regen | 3.32 | 0.05 | 0.17 | 0.18 |
| SWIR, NIR & Visible | TerraScan | 31 | Burned Low Regen  | 3.32 | 0.01 | 0.09 | 0.09 |
| SWIR, NIR & Visible | TerraScan | 31 | Road              | 3.32 | 0.01 | 0.05 | 0.05 |
| SWIR, NIR & Visible | TerraScan | 31 | Unburned          | 3.32 | 0.12 | 0.20 | 0.23 |
| SWIR, NIR & Visible | TerraScan | 32 | Burned            | 1.53 | 0.03 | 0.13 | 0.13 |
| SWIR, NIR & Visible | TerraScan | 32 | Burned High Regen | 1.53 | 0.01 | 0.16 | 0.16 |
| SWIR, NIR & Visible | TerraScan | 32 | Burned Low Regen  | 1.53 | 0.05 | 0.09 | 0.11 |
| SWIR, NIR & Visible | TerraScan | 32 | Road              | 1.53 | 0.01 | 0.04 | 0.05 |
| SWIR, NIR & Visible | TerraScan | 32 | Unburned          | 1.53 | 0.07 | 0.19 | 0.20 |
| SWIR, NIR & Visible | TerraScan | 28 | Burned            | 2.27 | 0.00 | 0.14 | 0.14 |
| SWIR, NIR & Visible | TerraScan | 28 | Burned High Regen | 2.27 | 0.03 | 0.17 | 0.18 |
| SWIR, NIR & Visible | TerraScan | 28 | Burned Low Regen  | 2.27 | 0.03 | 0.09 | 0.10 |
| SWIR, NIR & Visible | TerraScan | 28 | Road              | 2.27 | 0.01 | 0.05 | 0.05 |
| SWIR, NIR & Visible | TerraScan | 28 | Unburned          | 2.27 | 0.09 | 0.19 | 0.21 |
| NIR                 | TerraScan | 9  | Burned            | 0.46 | 0.05 | 0.14 | 0.14 |
| NIR                 | TerraScan | 9  | Burned High Regen | 0.46 | 0.03 | 0.16 | 0.16 |
| NIR                 | TerraScan | 9  | Burned Low Regen  | 0.46 | 0.07 | 0.11 | 0.13 |
| NIR                 | TerraScan | 9  | Road              | 0.46 | 0.00 | 0.04 | 0.04 |
| NIR                 | TerraScan | 9  | Unburned          | 0.46 | 0.04 | 0.20 | 0.20 |
| NIR                 | TerraScan | 14 | Burned            | 0.75 | 0.02 | 0.13 | 0.13 |
| NIR                 | TerraScan | 14 | Burned High Regen | 0.75 | 0.00 | 0.17 | 0.17 |
| NIR                 | TerraScan | 14 | Burned Low Regen  | 0.75 | 0.05 | 0.10 | 0.11 |
| NIR                 | TerraScan | 14 | Road              | 0.75 | 0.00 | 0.04 | 0.04 |
| NIR                 | TerraScan | 14 | Unburned          | 0.75 | 0.06 | 0.20 | 0.21 |
| NIR                 | TerraScan | 19 | Burned            | 1.03 | 0.01 | 0.14 | 0.14 |
| NIR                 | TerraScan | 19 | Burned High Regen | 1.03 | 0.03 | 0.16 | 0.17 |
| NIR                 | TerraScan | 19 | Burned Low Regen  | 1.03 | 0.03 | 0.10 | 0.10 |
| NIR                 | TerraScan | 19 | Road              | 1.03 | 0.00 | 0.04 | 0.04 |
| NIR                 | TerraScan | 19 | Unburned          | 1.03 | 0.09 | 0.20 | 0.22 |
| NIR                 | TerraScan | 24 | Burned            | 1.20 | 0.01 | 0.14 | 0.14 |
| NIR                 | TerraScan | 24 | Burned High Regen | 1.20 | 0.04 | 0.17 | 0.18 |
| NIR                 | TerraScan | 24 | Burned Low Regen  | 1.20 | 0.02 | 0.10 | 0.10 |
| NIR                 | TerraScan | 24 | Road              | 1.20 | 0.00 | 0.04 | 0.04 |
| NIR                 | TerraScan | 24 | Unburned          | 1.20 | 0.11 | 0.19 | 0.22 |
| NIR                 | TerraScan | 1  | Burned            | 0.82 | 0.02 | 0.13 | 0.14 |

|     |           |    |                   |      |      |      |      |
|-----|-----------|----|-------------------|------|------|------|------|
| NIR | TerraScan | 1  | Burned High Regen | 0.82 | 0.01 | 0.17 | 0.17 |
| NIR | TerraScan | 1  | Burned Low Regen  | 0.82 | 0.05 | 0.10 | 0.11 |
| NIR | TerraScan | 1  | Road              | 0.82 | 0.00 | 0.04 | 0.04 |
| NIR | TerraScan | 1  | Unburned          | 0.82 | 0.07 | 0.20 | 0.21 |
| NIR | TerraScan | 2  | Burned            | 0.82 | 0.02 | 0.13 | 0.14 |
| NIR | TerraScan | 2  | Burned High Regen | 0.82 | 0.01 | 0.17 | 0.17 |
| NIR | TerraScan | 2  | Burned Low Regen  | 0.82 | 0.05 | 0.10 | 0.11 |
| NIR | TerraScan | 2  | Road              | 0.82 | 0.00 | 0.04 | 0.04 |
| NIR | TerraScan | 2  | Unburned          | 0.82 | 0.07 | 0.20 | 0.21 |
| NIR | TerraScan | 3  | Burned            | 0.82 | 0.02 | 0.13 | 0.14 |
| NIR | TerraScan | 3  | Burned High Regen | 0.82 | 0.01 | 0.17 | 0.17 |
| NIR | TerraScan | 3  | Burned Low Regen  | 0.82 | 0.05 | 0.10 | 0.11 |
| NIR | TerraScan | 3  | Road              | 0.82 | 0.00 | 0.04 | 0.04 |
| NIR | TerraScan | 3  | Unburned          | 0.82 | 0.07 | 0.20 | 0.21 |
| NIR | TerraScan | 4  | Burned            | 0.82 | 0.02 | 0.13 | 0.14 |
| NIR | TerraScan | 4  | Burned High Regen | 0.82 | 0.01 | 0.17 | 0.17 |
| NIR | TerraScan | 4  | Burned Low Regen  | 0.82 | 0.05 | 0.10 | 0.11 |
| NIR | TerraScan | 4  | Road              | 0.82 | 0.00 | 0.04 | 0.04 |
| NIR | TerraScan | 4  | Unburned          | 0.82 | 0.07 | 0.20 | 0.21 |
| NIR | TerraScan | 5  | Burned            | 0.82 | 0.02 | 0.13 | 0.14 |
| NIR | TerraScan | 5  | Burned High Regen | 0.82 | 0.01 | 0.17 | 0.17 |
| NIR | TerraScan | 5  | Burned Low Regen  | 0.82 | 0.05 | 0.10 | 0.11 |
| NIR | TerraScan | 5  | Road              | 0.82 | 0.00 | 0.04 | 0.04 |
| NIR | TerraScan | 5  | Unburned          | 0.82 | 0.07 | 0.20 | 0.21 |
| NIR | TerraScan | 6  | Burned            | 0.82 | 0.02 | 0.13 | 0.14 |
| NIR | TerraScan | 6  | Burned High Regen | 0.82 | 0.01 | 0.17 | 0.17 |
| NIR | TerraScan | 6  | Burned Low Regen  | 0.82 | 0.05 | 0.10 | 0.11 |
| NIR | TerraScan | 6  | Road              | 0.82 | 0.00 | 0.04 | 0.04 |
| NIR | TerraScan | 6  | Unburned          | 0.82 | 0.07 | 0.20 | 0.21 |
| NIR | TerraScan | 7  | Burned            | 0.82 | 0.02 | 0.13 | 0.14 |
| NIR | TerraScan | 7  | Burned High Regen | 0.82 | 0.01 | 0.17 | 0.17 |
| NIR | TerraScan | 7  | Burned Low Regen  | 0.82 | 0.05 | 0.10 | 0.11 |
| NIR | TerraScan | 7  | Road              | 0.82 | 0.00 | 0.04 | 0.04 |
| NIR | TerraScan | 7  | Unburned          | 0.82 | 0.07 | 0.20 | 0.21 |
| NIR | TerraScan | 8  | Burned            | 0.82 | 0.02 | 0.13 | 0.14 |
| NIR | TerraScan | 8  | Burned High Regen | 0.82 | 0.01 | 0.17 | 0.17 |
| NIR | TerraScan | 8  | Burned Low Regen  | 0.82 | 0.05 | 0.10 | 0.11 |
| NIR | TerraScan | 8  | Road              | 0.82 | 0.00 | 0.04 | 0.04 |
| NIR | TerraScan | 8  | Unburned          | 0.82 | 0.07 | 0.20 | 0.21 |
| NIR | TerraScan | 10 | Burned            | 0.46 | 0.05 | 0.14 | 0.15 |
| NIR | TerraScan | 10 | Burned High Regen | 0.46 | 0.03 | 0.16 | 0.16 |
| NIR | TerraScan | 10 | Burned Low Regen  | 0.46 | 0.07 | 0.11 | 0.13 |
| NIR | TerraScan | 10 | Road              | 0.46 | 0.00 | 0.04 | 0.04 |
| NIR | TerraScan | 10 | Unburned          | 0.46 | 0.03 | 0.19 | 0.19 |
| NIR | TerraScan | 11 | Burned            | 0.46 | 0.05 | 0.14 | 0.15 |
| NIR | TerraScan | 11 | Burned High Regen | 0.46 | 0.03 | 0.16 | 0.16 |
| NIR | TerraScan | 11 | Burned Low Regen  | 0.46 | 0.07 | 0.11 | 0.13 |
| NIR | TerraScan | 11 | Road              | 0.46 | 0.00 | 0.04 | 0.04 |
| NIR | TerraScan | 11 | Unburned          | 0.46 | 0.04 | 0.20 | 0.20 |
| NIR | TerraScan | 12 | Burned            | 0.46 | 0.05 | 0.14 | 0.14 |
| NIR | TerraScan | 12 | Burned High Regen | 0.46 | 0.03 | 0.16 | 0.16 |

|     |           |    |                   |      |      |      |      |
|-----|-----------|----|-------------------|------|------|------|------|
| NIR | TerraScan | 12 | Burned Low Regen  | 0.46 | 0.07 | 0.11 | 0.13 |
| NIR | TerraScan | 12 | Road              | 0.46 | 0.00 | 0.04 | 0.04 |
| NIR | TerraScan | 12 | Unburned          | 0.46 | 0.04 | 0.20 | 0.20 |
| NIR | TerraScan | 13 | Burned            | 0.46 | 0.05 | 0.14 | 0.14 |
| NIR | TerraScan | 13 | Burned High Regen | 0.46 | 0.03 | 0.16 | 0.16 |
| NIR | TerraScan | 13 | Burned Low Regen  | 0.46 | 0.07 | 0.11 | 0.13 |
| NIR | TerraScan | 13 | Road              | 0.46 | 0.00 | 0.04 | 0.04 |
| NIR | TerraScan | 13 | Unburned          | 0.46 | 0.04 | 0.20 | 0.20 |
| NIR | TerraScan | 15 | Burned            | 0.75 | 0.02 | 0.13 | 0.13 |
| NIR | TerraScan | 15 | Burned High Regen | 0.75 | 0.00 | 0.17 | 0.17 |
| NIR | TerraScan | 15 | Burned Low Regen  | 0.75 | 0.05 | 0.10 | 0.11 |
| NIR | TerraScan | 15 | Road              | 0.75 | 0.00 | 0.04 | 0.04 |
| NIR | TerraScan | 15 | Unburned          | 0.75 | 0.06 | 0.20 | 0.21 |
| NIR | TerraScan | 16 | Burned            | 0.75 | 0.02 | 0.13 | 0.13 |
| NIR | TerraScan | 16 | Burned High Regen | 0.75 | 0.00 | 0.17 | 0.17 |
| NIR | TerraScan | 16 | Burned Low Regen  | 0.75 | 0.05 | 0.10 | 0.11 |
| NIR | TerraScan | 16 | Road              | 0.75 | 0.00 | 0.04 | 0.04 |
| NIR | TerraScan | 16 | Unburned          | 0.75 | 0.06 | 0.20 | 0.21 |
| NIR | TerraScan | 17 | Burned            | 0.75 | 0.02 | 0.13 | 0.13 |
| NIR | TerraScan | 17 | Burned High Regen | 0.75 | 0.00 | 0.17 | 0.17 |
| NIR | TerraScan | 17 | Burned Low Regen  | 0.75 | 0.05 | 0.10 | 0.11 |
| NIR | TerraScan | 17 | Road              | 0.75 | 0.00 | 0.04 | 0.04 |
| NIR | TerraScan | 17 | Unburned          | 0.75 | 0.06 | 0.20 | 0.21 |
| NIR | TerraScan | 18 | Burned            | 0.75 | 0.02 | 0.13 | 0.13 |
| NIR | TerraScan | 18 | Burned High Regen | 0.75 | 0.00 | 0.17 | 0.17 |
| NIR | TerraScan | 18 | Burned Low Regen  | 0.75 | 0.05 | 0.10 | 0.11 |
| NIR | TerraScan | 18 | Road              | 0.75 | 0.00 | 0.04 | 0.04 |
| NIR | TerraScan | 18 | Unburned          | 0.75 | 0.06 | 0.20 | 0.21 |
| NIR | TerraScan | 20 | Burned            | 1.03 | 0.00 | 0.14 | 0.14 |
| NIR | TerraScan | 20 | Burned High Regen | 1.03 | 0.03 | 0.16 | 0.17 |
| NIR | TerraScan | 20 | Burned Low Regen  | 1.03 | 0.03 | 0.10 | 0.10 |
| NIR | TerraScan | 20 | Road              | 1.03 | 0.00 | 0.04 | 0.04 |
| NIR | TerraScan | 20 | Unburned          | 1.03 | 0.09 | 0.20 | 0.22 |
| NIR | TerraScan | 21 | Burned            | 1.03 | 0.00 | 0.14 | 0.14 |
| NIR | TerraScan | 21 | Burned High Regen | 1.03 | 0.03 | 0.16 | 0.17 |
| NIR | TerraScan | 21 | Burned Low Regen  | 1.03 | 0.03 | 0.10 | 0.10 |
| NIR | TerraScan | 21 | Road              | 1.03 | 0.00 | 0.04 | 0.04 |
| NIR | TerraScan | 21 | Unburned          | 1.03 | 0.09 | 0.20 | 0.22 |
| NIR | TerraScan | 22 | Burned            | 1.03 | 0.00 | 0.14 | 0.14 |
| NIR | TerraScan | 22 | Burned High Regen | 1.03 | 0.03 | 0.16 | 0.17 |
| NIR | TerraScan | 22 | Burned Low Regen  | 1.03 | 0.03 | 0.10 | 0.10 |
| NIR | TerraScan | 22 | Road              | 1.03 | 0.00 | 0.04 | 0.04 |
| NIR | TerraScan | 22 | Unburned          | 1.03 | 0.09 | 0.20 | 0.22 |
| NIR | TerraScan | 24 | Burned            | 1.03 | 0.00 | 0.14 | 0.14 |
| NIR | TerraScan | 23 | Burned High Regen | 1.03 | 0.03 | 0.16 | 0.17 |
| NIR | TerraScan | 23 | Burned Low Regen  | 1.03 | 0.03 | 0.10 | 0.10 |
| NIR | TerraScan | 23 | Road              | 1.03 | 0.00 | 0.04 | 0.04 |
| NIR | TerraScan | 23 | Unburned          | 1.03 | 0.09 | 0.20 | 0.22 |
| NIR | TerraScan | 25 | Burned            | 1.20 | 0.01 | 0.14 | 0.14 |
| NIR | TerraScan | 25 | Burned High Regen | 1.20 | 0.04 | 0.17 | 0.18 |
| NIR | TerraScan | 25 | Burned Low Regen  | 1.20 | 0.02 | 0.10 | 0.10 |

|         |           |    |                   |      |      |      |      |
|---------|-----------|----|-------------------|------|------|------|------|
| NIR     | TerraScan | 25 | Road              | 1.20 | 0.00 | 0.04 | 0.04 |
| NIR     | TerraScan | 25 | Unburned          | 1.20 | 0.11 | 0.19 | 0.22 |
| NIR     | TerraScan | 26 | Burned            | 1.20 | 0.01 | 0.14 | 0.14 |
| NIR     | TerraScan | 26 | Burned High Regen | 1.20 | 0.04 | 0.17 | 0.18 |
| NIR     | TerraScan | 26 | Burned Low Regen  | 1.20 | 0.02 | 0.10 | 0.10 |
| NIR     | TerraScan | 26 | Road              | 1.20 | 0.00 | 0.04 | 0.04 |
| NIR     | TerraScan | 26 | Unburned          | 1.20 | 0.11 | 0.19 | 0.22 |
| NIR     | TerraScan | 27 | Burned            | 1.20 | 0.01 | 0.14 | 0.14 |
| NIR     | TerraScan | 27 | Burned High Regen | 1.20 | 0.04 | 0.17 | 0.18 |
| NIR     | TerraScan | 27 | Burned Low Regen  | 1.20 | 0.02 | 0.10 | 0.10 |
| NIR     | TerraScan | 27 | Road              | 1.20 | 0.00 | 0.04 | 0.04 |
| NIR     | TerraScan | 27 | Unburned          | 1.20 | 0.11 | 0.19 | 0.22 |
| NIR     | TerraScan | 28 | Burned            | 1.20 | 0.01 | 0.14 | 0.14 |
| NIR     | TerraScan | 28 | Burned High Regen | 1.20 | 0.04 | 0.17 | 0.18 |
| NIR     | TerraScan | 28 | Burned Low Regen  | 1.20 | 0.02 | 0.10 | 0.10 |
| NIR     | TerraScan | 28 | Road              | 1.20 | 0.00 | 0.04 | 0.04 |
| NIR     | TerraScan | 28 | Unburned          | 1.20 | 0.11 | 0.19 | 0.22 |
| Visible | TerraScan | 9  | Burned            | 0.53 | 0.00 | 0.14 | 0.14 |
| Visible | TerraScan | 9  | Burned High Regen | 0.53 | 0.03 | 0.17 | 0.17 |
| Visible | TerraScan | 9  | Burned Low Regen  | 0.53 | 0.03 | 0.10 | 0.10 |
| Visible | TerraScan | 9  | Road              | 0.53 | 0.01 | 0.05 | 0.05 |
| Visible | TerraScan | 9  | Unburned          | 0.53 | 0.11 | 0.19 | 0.22 |
| Visible | TerraScan | 14 | Burned            | 0.86 | 0.03 | 0.13 | 0.14 |
| Visible | TerraScan | 14 | Burned High Regen | 0.86 | 0.06 | 0.17 | 0.18 |
| Visible | TerraScan | 14 | Burned Low Regen  | 0.86 | 0.00 | 0.09 | 0.09 |
| Visible | TerraScan | 14 | Road              | 0.86 | 0.01 | 0.05 | 0.05 |
| Visible | TerraScan | 14 | Unburned          | 0.86 | 0.14 | 0.19 | 0.24 |
| Visible | TerraScan | 19 | Burned            | 1.12 | 0.05 | 0.14 | 0.15 |
| Visible | TerraScan | 19 | Burned High Regen | 1.12 | 0.07 | 0.17 | 0.18 |
| Visible | TerraScan | 19 | Burned Low Regen  | 1.12 | 0.02 | 0.09 | 0.09 |
| Visible | TerraScan | 19 | Road              | 1.12 | 0.01 | 0.05 | 0.05 |
| Visible | TerraScan | 19 | Unburned          | 1.12 | 0.16 | 0.20 | 0.25 |
| Visible | TerraScan | 24 | Burned            | 1.23 | 0.05 | 0.14 | 0.15 |
| Visible | TerraScan | 24 | Burned High Regen | 1.23 | 0.08 | 0.17 | 0.19 |
| Visible | TerraScan | 24 | Burned Low Regen  | 1.23 | 0.02 | 0.09 | 0.09 |
| Visible | TerraScan | 24 | Road              | 1.23 | 0.01 | 0.05 | 0.05 |
| Visible | TerraScan | 24 | Unburned          | 1.23 | 0.17 | 0.20 | 0.26 |
| Visible | TerraScan | 1  | Burned            | 0.93 | 0.03 | 0.13 | 0.14 |
| Visible | TerraScan | 1  | Burned High Regen | 0.93 | 0.06 | 0.17 | 0.18 |
| Visible | TerraScan | 1  | Burned Low Regen  | 0.93 | 0.01 | 0.09 | 0.09 |
| Visible | TerraScan | 1  | Road              | 0.93 | 0.01 | 0.05 | 0.05 |
| Visible | TerraScan | 1  | Unburned          | 0.93 | 0.15 | 0.20 | 0.24 |
| Visible | TerraScan | 2  | Burned            | 0.93 | 0.03 | 0.13 | 0.14 |
| Visible | TerraScan | 2  | Burned High Regen | 0.93 | 0.06 | 0.17 | 0.18 |
| Visible | TerraScan | 2  | Burned Low Regen  | 0.93 | 0.01 | 0.09 | 0.09 |
| Visible | TerraScan | 2  | Road              | 0.93 | 0.01 | 0.05 | 0.05 |
| Visible | TerraScan | 2  | Unburned          | 0.93 | 0.15 | 0.20 | 0.24 |
| Visible | TerraScan | 3  | Burned            | 0.93 | 0.03 | 0.13 | 0.14 |
| Visible | TerraScan | 3  | Burned High Regen | 0.93 | 0.06 | 0.17 | 0.18 |
| Visible | TerraScan | 3  | Burned Low Regen  | 0.93 | 0.01 | 0.09 | 0.09 |
| Visible | TerraScan | 3  | Road              | 0.93 | 0.01 | 0.05 | 0.05 |



|         |           |    |                   |      |      |      |      |
|---------|-----------|----|-------------------|------|------|------|------|
| Visible | TerraScan | 3  | Unburned          | 0.93 | 0.15 | 0.20 | 0.24 |
| Visible | TerraScan | 4  | Burned            | 0.93 | 0.03 | 0.13 | 0.14 |
| Visible | TerraScan | 4  | Burned High Regen | 0.93 | 0.06 | 0.17 | 0.18 |
| Visible | TerraScan | 4  | Burned Low Regen  | 0.93 | 0.01 | 0.09 | 0.09 |
| Visible | TerraScan | 4  | Road              | 0.93 | 0.01 | 0.05 | 0.05 |
| Visible | TerraScan | 4  | Unburned          | 0.93 | 0.15 | 0.20 | 0.24 |
| Visible | TerraScan | 5  | Burned            | 0.93 | 0.03 | 0.13 | 0.14 |
| Visible | TerraScan | 5  | Burned High Regen | 0.93 | 0.06 | 0.17 | 0.18 |
| Visible | TerraScan | 5  | Burned Low Regen  | 0.93 | 0.01 | 0.09 | 0.09 |
| Visible | TerraScan | 5  | Road              | 0.93 | 0.01 | 0.05 | 0.05 |
| Visible | TerraScan | 5  | Unburned          | 0.93 | 0.15 | 0.20 | 0.24 |
| Visible | TerraScan | 6  | Burned            | 0.93 | 0.03 | 0.13 | 0.14 |
| Visible | TerraScan | 6  | Burned High Regen | 0.93 | 0.06 | 0.17 | 0.18 |
| Visible | TerraScan | 6  | Burned Low Regen  | 0.93 | 0.01 | 0.09 | 0.09 |
| Visible | TerraScan | 6  | Road              | 0.93 | 0.01 | 0.05 | 0.05 |
| Visible | TerraScan | 6  | Unburned          | 0.93 | 0.15 | 0.20 | 0.24 |
| Visible | TerraScan | 7  | Burned            | 0.93 | 0.03 | 0.13 | 0.14 |
| Visible | TerraScan | 7  | Burned High Regen | 0.93 | 0.06 | 0.17 | 0.18 |
| Visible | TerraScan | 7  | Burned Low Regen  | 0.93 | 0.01 | 0.09 | 0.09 |
| Visible | TerraScan | 7  | Road              | 0.93 | 0.01 | 0.05 | 0.05 |
| Visible | TerraScan | 7  | Unburned          | 0.93 | 0.15 | 0.20 | 0.24 |
| Visible | TerraScan | 8  | Burned            | 0.93 | 0.03 | 0.13 | 0.14 |
| Visible | TerraScan | 8  | Burned High Regen | 0.93 | 0.06 | 0.17 | 0.18 |
| Visible | TerraScan | 8  | Burned Low Regen  | 0.93 | 0.01 | 0.09 | 0.09 |
| Visible | TerraScan | 8  | Road              | 0.93 | 0.01 | 0.05 | 0.05 |
| Visible | TerraScan | 8  | Unburned          | 0.93 | 0.15 | 0.20 | 0.24 |
| Visible | TerraScan | 10 | Burned            | 0.53 | 0.00 | 0.14 | 0.14 |
| Visible | TerraScan | 10 | Burned High Regen | 0.53 | 0.03 | 0.17 | 0.17 |
| Visible | TerraScan | 10 | Burned Low Regen  | 0.53 | 0.03 | 0.10 | 0.10 |
| Visible | TerraScan | 10 | Road              | 0.53 | 0.01 | 0.05 | 0.05 |
| Visible | TerraScan | 10 | Unburned          | 0.53 | 0.11 | 0.19 | 0.22 |
| Visible | TerraScan | 11 | Burned            | 0.53 | 0.00 | 0.14 | 0.14 |
| Visible | TerraScan | 11 | Burned High Regen | 0.53 | 0.03 | 0.17 | 0.17 |
| Visible | TerraScan | 11 | Burned Low Regen  | 0.53 | 0.03 | 0.10 | 0.10 |
| Visible | TerraScan | 11 | Road              | 0.53 | 0.01 | 0.05 | 0.05 |
| Visible | TerraScan | 11 | Unburned          | 0.53 | 0.11 | 0.19 | 0.22 |
| Visible | TerraScan | 12 | Burned            | 0.53 | 0.00 | 0.14 | 0.14 |
| Visible | TerraScan | 12 | Burned High Regen | 0.53 | 0.03 | 0.17 | 0.17 |
| Visible | TerraScan | 12 | Burned Low Regen  | 0.53 | 0.03 | 0.10 | 0.10 |
| Visible | TerraScan | 12 | Road              | 0.53 | 0.01 | 0.05 | 0.05 |
| Visible | TerraScan | 12 | Unburned          | 0.53 | 0.11 | 0.19 | 0.22 |
| Visible | TerraScan | 13 | Burned            | 0.53 | 0.00 | 0.14 | 0.14 |
| Visible | TerraScan | 13 | Burned High Regen | 0.53 | 0.03 | 0.17 | 0.17 |
| Visible | TerraScan | 13 | Burned Low Regen  | 0.53 | 0.03 | 0.10 | 0.10 |
| Visible | TerraScan | 13 | Road              | 0.53 | 0.01 | 0.05 | 0.05 |
| Visible | TerraScan | 13 | Unburned          | 0.53 | 0.11 | 0.19 | 0.22 |
| Visible | TerraScan | 15 | Burned            | 0.86 | 0.03 | 0.13 | 0.14 |
| Visible | TerraScan | 15 | Burned High Regen | 0.86 | 0.06 | 0.17 | 0.18 |
| Visible | TerraScan | 15 | Burned Low Regen  | 0.86 | 0.00 | 0.09 | 0.09 |
| Visible | TerraScan | 15 | Road              | 0.86 | 0.01 | 0.05 | 0.05 |
| Visible | TerraScan | 15 | Unburned          | 0.86 | 0.14 | 0.20 | 0.24 |

|         |           |    |                   |      |      |      |      |
|---------|-----------|----|-------------------|------|------|------|------|
| Visible | TerraScan | 16 | Burned            | 0.86 | 0.03 | 0.13 | 0.14 |
| Visible | TerraScan | 16 | Burned High Regen | 0.86 | 0.06 | 0.17 | 0.18 |
| Visible | TerraScan | 16 | Burned Low Regen  | 0.86 | 0.00 | 0.09 | 0.09 |
| Visible | TerraScan | 16 | Road              | 0.86 | 0.01 | 0.05 | 0.05 |
| Visible | TerraScan | 16 | Unburned          | 0.86 | 0.14 | 0.20 | 0.24 |
| Visible | TerraScan | 17 | Burned            | 0.86 | 0.03 | 0.13 | 0.14 |
| Visible | TerraScan | 17 | Burned High Regen | 0.86 | 0.06 | 0.17 | 0.18 |
| Visible | TerraScan | 17 | Burned Low Regen  | 0.86 | 0.00 | 0.09 | 0.09 |
| Visible | TerraScan | 17 | Road              | 0.86 | 0.01 | 0.05 | 0.05 |
| Visible | TerraScan | 17 | Unburned          | 0.86 | 0.14 | 0.19 | 0.24 |
| Visible | TerraScan | 18 | Burned            | 0.86 | 0.03 | 0.13 | 0.14 |
| Visible | TerraScan | 18 | Burned High Regen | 0.86 | 0.06 | 0.17 | 0.18 |
| Visible | TerraScan | 18 | Burned Low Regen  | 0.86 | 0.00 | 0.09 | 0.09 |
| Visible | TerraScan | 18 | Road              | 0.86 | 0.01 | 0.05 | 0.05 |
| Visible | TerraScan | 18 | Unburned          | 0.86 | 0.14 | 0.19 | 0.24 |
| Visible | TerraScan | 20 | Burned            | 1.12 | 0.05 | 0.14 | 0.15 |
| Visible | TerraScan | 20 | Burned High Regen | 1.12 | 0.07 | 0.17 | 0.18 |
| Visible | TerraScan | 20 | Burned Low Regen  | 1.12 | 0.02 | 0.09 | 0.09 |
| Visible | TerraScan | 20 | Road              | 1.12 | 0.01 | 0.05 | 0.05 |
| Visible | TerraScan | 20 | Unburned          | 1.12 | 0.15 | 0.20 | 0.25 |
| Visible | TerraScan | 21 | Burned            | 1.12 | 0.05 | 0.14 | 0.15 |
| Visible | TerraScan | 21 | Burned High Regen | 1.12 | 0.07 | 0.17 | 0.19 |
| Visible | TerraScan | 21 | Burned Low Regen  | 1.12 | 0.02 | 0.09 | 0.09 |
| Visible | TerraScan | 21 | Road              | 1.12 | 0.01 | 0.05 | 0.05 |
| Visible | TerraScan | 21 | Unburned          | 1.12 | 0.16 | 0.20 | 0.25 |
| Visible | TerraScan | 22 | Burned            | 1.12 | 0.05 | 0.14 | 0.15 |
| Visible | TerraScan | 22 | Burned High Regen | 1.12 | 0.07 | 0.17 | 0.19 |
| Visible | TerraScan | 22 | Burned Low Regen  | 1.12 | 0.02 | 0.09 | 0.09 |
| Visible | TerraScan | 22 | Road              | 1.12 | 0.01 | 0.05 | 0.05 |
| Visible | TerraScan | 22 | Unburned          | 1.12 | 0.16 | 0.20 | 0.25 |
| Visible | TerraScan | 23 | Burned            | 1.12 | 0.05 | 0.14 | 0.15 |
| Visible | TerraScan | 23 | Burned High Regen | 1.12 | 0.07 | 0.17 | 0.19 |
| Visible | TerraScan | 23 | Burned Low Regen  | 1.12 | 0.02 | 0.09 | 0.09 |
| Visible | TerraScan | 23 | Road              | 1.12 | 0.01 | 0.05 | 0.05 |
| Visible | TerraScan | 23 | Unburned          | 1.12 | 0.16 | 0.20 | 0.25 |
| Visible | TerraScan | 25 | Burned            | 1.24 | 0.05 | 0.14 | 0.15 |
| Visible | TerraScan | 25 | Burned High Regen | 1.24 | 0.08 | 0.17 | 0.19 |
| Visible | TerraScan | 25 | Burned Low Regen  | 1.24 | 0.02 | 0.09 | 0.09 |
| Visible | TerraScan | 25 | Road              | 1.24 | 0.01 | 0.05 | 0.05 |
| Visible | TerraScan | 25 | Unburned          | 1.24 | 0.17 | 0.21 | 0.26 |
| Visible | TerraScan | 26 | Burned            | 1.24 | 0.05 | 0.14 | 0.15 |
| Visible | TerraScan | 26 | Burned High Regen | 1.24 | 0.08 | 0.17 | 0.19 |
| Visible | TerraScan | 26 | Burned Low Regen  | 1.24 | 0.02 | 0.09 | 0.09 |
| Visible | TerraScan | 26 | Road              | 1.24 | 0.01 | 0.05 | 0.05 |
| Visible | TerraScan | 26 | Unburned          | 1.24 | 0.17 | 0.20 | 0.26 |
| Visible | TerraScan | 27 | Burned            | 1.23 | 0.05 | 0.14 | 0.15 |
| Visible | TerraScan | 27 | Burned High Regen | 1.23 | 0.08 | 0.17 | 0.19 |
| Visible | TerraScan | 27 | Burned Low Regen  | 1.23 | 0.02 | 0.09 | 0.09 |
| Visible | TerraScan | 27 | Road              | 1.23 | 0.01 | 0.05 | 0.05 |
| Visible | TerraScan | 27 | Unburned          | 1.23 | 0.17 | 0.20 | 0.26 |
| Visible | TerraScan | 28 | Burned            | 1.23 | 0.05 | 0.14 | 0.15 |

|         |           |    |                   |      |      |      |      |
|---------|-----------|----|-------------------|------|------|------|------|
| Visible | TerraScan | 28 | Burned High Regen | 1.23 | 0.08 | 0.17 | 0.19 |
| Visible | TerraScan | 28 | Burned Low Regen  | 1.23 | 0.02 | 0.09 | 0.09 |
| Visible | TerraScan | 28 | Road              | 1.23 | 0.01 | 0.05 | 0.05 |
| Visible | TerraScan | 28 | Unburned          | 1.23 | 0.17 | 0.20 | 0.26 |
| SWIR    | LASTools  | A  | Unburned          | 1.28 | 0.11 | 0.22 | 0.19 |
| SWIR    | LASTools  | A  | Road              | 1.28 | 0.01 | 0.05 | 0.05 |
| SWIR    | LASTools  | A  | Burned High Regen | 1.28 | 0.03 | 0.18 | 0.18 |
| SWIR    | LASTools  | A  | Burned            | 1.28 | 0.00 | 0.14 | 0.14 |
| SWIR    | LASTools  | A  | Burned Low Regen  | 1.28 | 0.03 | 0.10 | 0.09 |
| SWIR    | LASTools  | C  | Unburned          | 1.28 | 0.10 | 0.22 | 0.20 |
| SWIR    | LASTools  | C  | Road              | 1.28 | 0.01 | 0.05 | 0.05 |
| SWIR    | LASTools  | C  | Burned High Regen | 1.28 | 0.03 | 0.18 | 0.18 |
| SWIR    | LASTools  | C  | Burned            | 1.28 | 0.00 | 0.14 | 0.14 |
| SWIR    | LASTools  | C  | Burned Low Regen  | 1.28 | 0.03 | 0.10 | 0.09 |
| SWIR    | LASTools  | B  | Unburned          | 1.27 | 0.10 | 0.22 | 0.20 |
| SWIR    | LASTools  | B  | Road              | 1.27 | 0.01 | 0.05 | 0.05 |
| SWIR    | LASTools  | B  | Burned High Regen | 1.27 | 0.03 | 0.18 | 0.18 |
| SWIR    | LASTools  | B  | Burned            | 1.27 | 0.00 | 0.14 | 0.14 |
| SWIR    | LASTools  | B  | Burned Low Regen  | 1.27 | 0.03 | 0.10 | 0.09 |
| SWIR    | LASTools  | E  | Unburned          | 1.28 | 0.11 | 0.22 | 0.20 |
| SWIR    | LASTools  | E  | Road              | 1.28 | 0.01 | 0.05 | 0.05 |
| SWIR    | LASTools  | E  | Burned High Regen | 1.28 | 0.03 | 0.18 | 0.18 |
| SWIR    | LASTools  | E  | Burned            | 1.28 | 0.00 | 0.14 | 0.14 |
| SWIR    | LASTools  | E  | Burned Low Regen  | 1.28 | 0.03 | 0.10 | 0.09 |
| SWIR    | LASTools  | D  | Unburned          | 1.28 | 0.10 | 0.23 | 0.20 |
| SWIR    | LASTools  | D  | Road              | 1.28 | 0.01 | 0.05 | 0.05 |
| SWIR    | LASTools  | D  | Burned High Regen | 1.28 | 0.03 | 0.19 | 0.18 |
| SWIR    | LASTools  | D  | Burned            | 1.28 | 0.00 | 0.15 | 0.15 |
| SWIR    | LASTools  | D  | Burned Low Regen  | 1.28 | 0.03 | 0.10 | 0.09 |
| SWIR    | LASTools  | F  | Unburned          | 1.32 | 0.10 | 0.22 | 0.20 |
| SWIR    | LASTools  | F  | Road              | 1.32 | 0.01 | 0.05 | 0.05 |
| SWIR    | LASTools  | F  | Burned High Regen | 1.32 | 0.03 | 0.18 | 0.18 |
| SWIR    | LASTools  | F  | Burned            | 1.32 | 0.01 | 0.14 | 0.14 |
| SWIR    | LASTools  | F  | Burned Low Regen  | 1.32 | 0.03 | 0.09 | 0.09 |
| SWIR    | LASTools  | H  | Unburned          | 1.33 | 0.10 | 0.22 | 0.20 |
| SWIR    | LASTools  | H  | Road              | 1.33 | 0.01 | 0.05 | 0.05 |
| SWIR    | LASTools  | H  | Burned High Regen | 1.33 | 0.03 | 0.18 | 0.17 |
| SWIR    | LASTools  | H  | Burned            | 1.33 | 0.01 | 0.14 | 0.14 |
| SWIR    | LASTools  | H  | Burned Low Regen  | 1.33 | 0.03 | 0.09 | 0.09 |
| SWIR    | LASTools  | G  | Unburned          | 1.33 | 0.10 | 0.22 | 0.20 |
| SWIR    | LASTools  | G  | Road              | 1.33 | 0.01 | 0.05 | 0.05 |
| SWIR    | LASTools  | G  | Burned High Regen | 1.33 | 0.03 | 0.18 | 0.17 |
| SWIR    | LASTools  | G  | Burned            | 1.33 | 0.00 | 0.14 | 0.14 |
| SWIR    | LASTools  | G  | Burned Low Regen  | 1.33 | 0.03 | 0.09 | 0.09 |
| SWIR    | LASTools  | J  | Unburned          | 1.34 | 0.10 | 0.22 | 0.20 |
| SWIR    | LASTools  | J  | Road              | 1.34 | 0.01 | 0.05 | 0.05 |
| SWIR    | LASTools  | J  | Burned High Regen | 1.34 | 0.03 | 0.18 | 0.17 |
| SWIR    | LASTools  | J  | Burned            | 1.34 | 0.00 | 0.14 | 0.14 |
| SWIR    | LASTools  | J  | Burned Low Regen  | 1.34 | 0.03 | 0.09 | 0.09 |
| SWIR    | LASTools  | I  | Unburned          | 1.34 | 0.10 | 0.22 | 0.20 |
| SWIR    | LASTools  | I  | Road              | 1.34 | 0.01 | 0.05 | 0.05 |

|      |          |   |                   |      |      |      |      |
|------|----------|---|-------------------|------|------|------|------|
| SWIR | LASTools | I | Burned High Regen | 1.34 | 0.03 | 0.18 | 0.17 |
| SWIR | LASTools | I | Burned            | 1.34 | 0.01 | 0.14 | 0.14 |
| SWIR | LASTools | I | Burned Low Regen  | 1.34 | 0.03 | 0.09 | 0.09 |
| NIR  | LASTools | A | Unburned          | 1.24 | 0.11 | 0.23 | 0.20 |
| NIR  | LASTools | A | Road              | 1.24 | 0.00 | 0.04 | 0.04 |
| NIR  | LASTools | A | Burned High Regen | 1.24 | 0.04 | 0.18 | 0.18 |
| NIR  | LASTools | A | Burned            | 1.24 | 0.02 | 0.15 | 0.15 |
| NIR  | LASTools | A | Burned Low Regen  | 1.24 | 0.01 | 0.10 | 0.10 |
| NIR  | LASTools | C | Unburned          | 1.24 | 0.10 | 0.22 | 0.20 |
| NIR  | LASTools | C | Road              | 1.24 | 0.00 | 0.04 | 0.04 |
| NIR  | LASTools | C | Burned High Regen | 1.24 | 0.04 | 0.18 | 0.17 |
| NIR  | LASTools | C | Burned            | 1.24 | 0.02 | 0.14 | 0.14 |
| NIR  | LASTools | C | Burned Low Regen  | 1.24 | 0.01 | 0.10 | 0.10 |
| NIR  | LASTools | B | Unburned          | 1.24 | 0.09 | 0.21 | 0.19 |
| NIR  | LASTools | B | Road              | 1.24 | 0.00 | 0.04 | 0.04 |
| NIR  | LASTools | B | Burned High Regen | 1.24 | 0.04 | 0.18 | 0.18 |
| NIR  | LASTools | B | Burned            | 1.24 | 0.02 | 0.14 | 0.14 |
| NIR  | LASTools | B | Burned Low Regen  | 1.24 | 0.01 | 0.10 | 0.10 |
| NIR  | LASTools | E | Unburned          | 1.24 | 0.10 | 0.22 | 0.19 |
| NIR  | LASTools | E | Road              | 1.24 | 0.00 | 0.04 | 0.04 |
| NIR  | LASTools | E | Burned High Regen | 1.24 | 0.04 | 0.18 | 0.17 |
| NIR  | LASTools | E | Burned            | 1.24 | 0.02 | 0.14 | 0.14 |
| NIR  | LASTools | E | Burned Low Regen  | 1.24 | 0.01 | 0.10 | 0.10 |
| NIR  | LASTools | D | Unburned          | 1.24 | 0.10 | 0.22 | 0.20 |
| NIR  | LASTools | D | Road              | 1.24 | 0.00 | 0.04 | 0.04 |
| NIR  | LASTools | D | Burned High Regen | 1.24 | 0.04 | 0.18 | 0.17 |
| NIR  | LASTools | D | Burned            | 1.24 | 0.02 | 0.14 | 0.14 |
| NIR  | LASTools | D | Burned Low Regen  | 1.24 | 0.01 | 0.10 | 0.10 |
| NIR  | LASTools | F | Unburned          | 1.28 | 0.11 | 0.23 | 0.20 |
| NIR  | LASTools | F | Road              | 1.28 | 0.00 | 0.04 | 0.04 |
| NIR  | LASTools | F | Burned High Regen | 1.28 | 0.04 | 0.18 | 0.18 |
| NIR  | LASTools | F | Burned            | 1.28 | 0.02 | 0.14 | 0.14 |
| NIR  | LASTools | F | Burned Low Regen  | 1.28 | 0.01 | 0.10 | 0.10 |
| NIR  | LASTools | H | Unburned          | 1.30 | 0.11 | 0.23 | 0.21 |
| NIR  | LASTools | H | Road              | 1.30 | 0.00 | 0.04 | 0.04 |
| NIR  | LASTools | H | Burned High Regen | 1.30 | 0.05 | 0.18 | 0.17 |
| NIR  | LASTools | H | Burned            | 1.30 | 0.02 | 0.14 | 0.14 |
| NIR  | LASTools | H | Burned Low Regen  | 1.30 | 0.01 | 0.09 | 0.09 |
| NIR  | LASTools | G | Unburned          | 1.30 | 0.11 | 0.23 | 0.20 |
| NIR  | LASTools | G | Road              | 1.30 | 0.00 | 0.04 | 0.04 |
| NIR  | LASTools | G | Burned High Regen | 1.30 | 0.05 | 0.18 | 0.17 |
| NIR  | LASTools | G | Burned            | 1.30 | 0.02 | 0.14 | 0.14 |
| NIR  | LASTools | G | Burned Low Regen  | 1.30 | 0.01 | 0.09 | 0.09 |
| NIR  | LASTools | J | Unburned          | 1.31 | 0.11 | 0.23 | 0.20 |
| NIR  | LASTools | J | Road              | 1.31 | 0.00 | 0.04 | 0.04 |
| NIR  | LASTools | J | Burned High Regen | 1.31 | 0.05 | 0.18 | 0.17 |
| NIR  | LASTools | J | Burned            | 1.31 | 0.02 | 0.14 | 0.14 |
| NIR  | LASTools | J | Burned Low Regen  | 1.31 | 0.01 | 0.09 | 0.09 |
| NIR  | LASTools | I | Unburned          | 1.30 | 0.11 | 0.23 | 0.20 |
| NIR  | LASTools | I | Road              | 1.30 | 0.00 | 0.04 | 0.04 |
| NIR  | LASTools | I | Burned High Regen | 1.30 | 0.05 | 0.18 | 0.17 |

|         |          |   |                   |      |      |      |      |
|---------|----------|---|-------------------|------|------|------|------|
| NIR     | LASTools | I | Burned            | 1.30 | 0.02 | 0.14 | 0.14 |
| NIR     | LASTools | I | Burned Low Regen  | 1.30 | 0.01 | 0.09 | 0.09 |
| Visible | LASTools | A | Unburned          | 1.30 | 0.17 | 0.26 | 0.20 |
| Visible | LASTools | A | Road              | 1.30 | 0.01 | 0.05 | 0.05 |
| Visible | LASTools | A | Burned High Regen | 1.30 | 0.08 | 0.19 | 0.17 |
| Visible | LASTools | A | Burned            | 1.30 | 0.06 | 0.15 | 0.14 |
| Visible | LASTools | A | Burned Low Regen  | 1.30 | 0.03 | 0.09 | 0.09 |
| Visible | LASTools | C | Unburned          | 1.30 | 0.17 | 0.26 | 0.20 |
| Visible | LASTools | C | Road              | 1.30 | 0.01 | 0.05 | 0.05 |
| Visible | LASTools | C | Burned High Regen | 1.30 | 0.09 | 0.19 | 0.17 |
| Visible | LASTools | C | Burned            | 1.30 | 0.06 | 0.15 | 0.14 |
| Visible | LASTools | C | Burned Low Regen  | 1.30 | 0.03 | 0.09 | 0.09 |
| Visible | LASTools | B | Unburned          | 1.30 | 0.16 | 0.26 | 0.20 |
| Visible | LASTools | B | Road              | 1.30 | 0.01 | 0.05 | 0.05 |
| Visible | LASTools | B | Burned High Regen | 1.30 | 0.09 | 0.19 | 0.17 |
| Visible | LASTools | B | Burned            | 1.30 | 0.06 | 0.15 | 0.14 |
| Visible | LASTools | B | Burned Low Regen  | 1.30 | 0.03 | 0.09 | 0.09 |
| Visible | LASTools | E | Unburned          | 1.30 | 0.16 | 0.26 | 0.20 |
| Visible | LASTools | E | Road              | 1.30 | 0.01 | 0.05 | 0.05 |
| Visible | LASTools | E | Burned High Regen | 1.30 | 0.08 | 0.19 | 0.17 |
| Visible | LASTools | E | Burned            | 1.30 | 0.06 | 0.15 | 0.14 |
| Visible | LASTools | E | Burned Low Regen  | 1.30 | 0.03 | 0.09 | 0.09 |
| Visible | LASTools | D | Unburned          | 1.30 | 0.17 | 0.26 | 0.20 |
| Visible | LASTools | D | Road              | 1.30 | 0.01 | 0.05 | 0.05 |
| Visible | LASTools | D | Burned High Regen | 1.30 | 0.09 | 0.19 | 0.17 |
| Visible | LASTools | D | Burned            | 1.30 | 0.06 | 0.15 | 0.14 |
| Visible | LASTools | D | Burned Low Regen  | 1.30 | 0.03 | 0.09 | 0.09 |
| Visible | LASTools | F | Unburned          | 1.32 | 0.17 | 0.26 | 0.20 |
| Visible | LASTools | F | Road              | 1.32 | 0.00 | 0.05 | 0.05 |
| Visible | LASTools | F | Burned High Regen | 1.32 | 0.09 | 0.19 | 0.17 |
| Visible | LASTools | F | Burned            | 1.32 | 0.06 | 0.15 | 0.14 |
| Visible | LASTools | F | Burned Low Regen  | 1.32 | 0.03 | 0.09 | 0.09 |
| Visible | LASTools | H | Unburned          | 1.33 | 0.17 | 0.26 | 0.20 |
| Visible | LASTools | H | Road              | 1.33 | 0.00 | 0.05 | 0.05 |
| Visible | LASTools | H | Burned High Regen | 1.33 | 0.09 | 0.19 | 0.18 |
| Visible | LASTools | H | Burned            | 1.33 | 0.06 | 0.15 | 0.14 |
| Visible | LASTools | H | Burned Low Regen  | 1.33 | 0.03 | 0.09 | 0.09 |
| Visible | LASTools | G | Unburned          | 1.33 | 0.17 | 0.26 | 0.20 |
| Visible | LASTools | G | Road              | 1.33 | 0.00 | 0.05 | 0.05 |
| Visible | LASTools | G | Burned High Regen | 1.33 | 0.09 | 0.19 | 0.17 |
| Visible | LASTools | G | Burned            | 1.33 | 0.06 | 0.15 | 0.14 |
| Visible | LASTools | G | Burned Low Regen  | 1.33 | 0.03 | 0.09 | 0.09 |
| Visible | LASTools | J | Unburned          | 1.33 | 0.17 | 0.26 | 0.20 |
| Visible | LASTools | J | Road              | 1.33 | 0.00 | 0.05 | 0.05 |
| Visible | LASTools | J | Burned High Regen | 1.33 | 0.09 | 0.19 | 0.17 |
| Visible | LASTools | J | Burned            | 1.33 | 0.06 | 0.15 | 0.14 |
| Visible | LASTools | J | Burned Low Regen  | 1.33 | 0.03 | 0.09 | 0.09 |
| Visible | LASTools | I | Unburned          | 1.33 | 0.17 | 0.26 | 0.20 |
| Visible | LASTools | I | Road              | 1.33 | 0.00 | 0.05 | 0.05 |
| Visible | LASTools | I | Burned High Regen | 1.33 | 0.09 | 0.19 | 0.17 |
| Visible | LASTools | I | Burned            | 1.33 | 0.06 | 0.15 | 0.14 |

|            |          |   |                   |      |      |      |        |
|------------|----------|---|-------------------|------|------|------|--------|
| Visible    | LASTools | I | Burned Low Regen  | 1.33 | 0.03 | 0.09 | 0.09   |
| SWIR & NIR | LASTools | A | Unburned          | 2.41 | 0.11 | 0.23 | 0.20   |
| SWIR & NIR | LASTools | A | Road              | 2.41 | 0.00 | 0.05 | 0.05   |
| SWIR & NIR | LASTools | A | Burned High Regen | 2.41 | 0.03 | 0.18 | 0.18   |
| SWIR & NIR | LASTools | A | Burned            | 2.41 | 0.01 | 0.14 | 0.14   |
| SWIR & NIR | LASTools | A | Burned Low Regen  | 2.41 | 0.02 | 0.10 | 0.10   |
| SWIR & NIR | LASTools | A | Unburned          | 2.41 | 0.10 | 0.22 | 0.19   |
| SWIR & NIR | LASTools | C | Road              | 2.41 | 0.00 | 0.04 | 0.04   |
| SWIR & NIR | LASTools | C | Burned High Regen | 2.41 | 0.03 | 0.18 | 0.18   |
| SWIR & NIR | LASTools | C | Burned            | 2.41 | 0.01 | 0.14 | 0.14   |
| SWIR & NIR | LASTools | C | Burned Low Regen  | 2.41 | 0.02 | 0.10 | 0.09   |
| SWIR & NIR | LASTools | B | Unburned          | 2.40 | 0.11 | 0.22 | 0.19   |
| SWIR & NIR | LASTools | B | Road              | 2.40 | 0.00 | 0.05 | 0.05   |
| SWIR & NIR | LASTools | B | Burned High Regen | 2.40 | 0.03 | 0.18 | 0.18   |
| SWIR & NIR | LASTools | B | Burned            | 2.40 | 0.01 | 0.14 | 0.14   |
| SWIR & NIR | LASTools | B | Burned Low Regen  | 2.40 | 0.02 | 0.10 | 0.09   |
| SWIR & NIR | LASTools | E | Unburned          | 2.42 | 0.11 | 0.23 | 0.20   |
| SWIR & NIR | LASTools | E | Road              | 2.42 | 0.00 | 0.05 | 0.05   |
| SWIR & NIR | LASTools | E | Burned High Regen | 2.42 | 0.03 | 0.18 | 0.18   |
| SWIR & NIR | LASTools | E | Burned            | 2.42 | 0.01 | 0.14 | 0.14   |
| SWIR & NIR | LASTools | E | Burned Low Regen  | 2.42 | 0.02 | 0.09 | 0.09   |
| SWIR & NIR | LASTools | D | Unburned          | 2.41 | 0.11 | 0.22 | 0.20   |
| SWIR & NIR | LASTools | D | Road              | 2.41 | 0.00 | 0.05 | 0.05   |
| SWIR & NIR | LASTools | D | Burned High Regen | 2.41 | 0.03 | 0.18 | 0.18   |
| SWIR & NIR | LASTools | D | Burned            | 2.41 | 0.01 | 0.14 | 0.14   |
| SWIR & NIR | LASTools | D | Burned Low Regen  | 2.41 | 0.02 | 0.09 | 0.09   |
| SWIR & NIR | LASTools | F | Unburned          | 2.58 | 0.11 | 0.23 | 0.20   |
| SWIR & NIR | LASTools | F | Road              | 2.58 | 0.00 | 0.05 | 0.05   |
| SWIR & NIR | LASTools | F | Burned High Regen | 2.58 | 0.04 | 0.18 | 175.00 |
| SWIR & NIR | LASTools | F | Burned            | 2.58 | 0.02 | 0.14 | 0.14   |
| SWIR & NIR | LASTools | F | Burned Low Regen  | 2.58 | 0.02 | 0.09 | 0.09   |
| SWIR & NIR | LASTools | H | Unburned          | 2.60 | 0.11 | 0.23 | 0.20   |
| SWIR & NIR | LASTools | H | Road              | 2.60 | 0.00 | 0.05 | 0.05   |
| SWIR & NIR | LASTools | H | Burned High Regen | 2.60 | 0.04 | 0.18 | 0.17   |
| SWIR & NIR | LASTools | H | Burned            | 2.60 | 0.02 | 0.14 | 0.14   |
| SWIR & NIR | LASTools | H | Burned Low Regen  | 2.60 | 0.01 | 0.09 | 0.09   |
| SWIR & NIR | LASTools | G | Unburned          | 2.60 | 0.11 | 0.23 | 0.20   |
| SWIR & NIR | LASTools | G | Road              | 2.60 | 0.00 | 0.05 | 0.05   |
| SWIR & NIR | LASTools | G | Burned High Regen | 2.60 | 0.04 | 0.18 | 0.17   |
| SWIR & NIR | LASTools | G | Burned            | 2.60 | 0.02 | 0.14 | 0.14   |
| SWIR & NIR | LASTools | G | Burned Low Regen  | 2.60 | 0.01 | 0.09 | 0.09   |
| SWIR & NIR | LASTools | J | Unburned          | 2.61 | 0.11 | 0.23 | 0.20   |
| SWIR & NIR | LASTools | J | Road              | 2.61 | 0.00 | 0.05 | 0.05   |
| SWIR & NIR | LASTools | J | Burned High Regen | 2.61 | 0.04 | 0.18 | 0.18   |
| SWIR & NIR | LASTools | J | Burned            | 2.61 | 0.02 | 0.14 | 0.14   |
| SWIR & NIR | LASTools | J | Burned Low Regen  | 2.61 | 0.01 | 0.09 | 0.09   |
| SWIR & NIR | LASTools | I | Unburned          | 2.61 | 0.11 | 0.23 | 0.20   |
| SWIR & NIR | LASTools | I | Road              | 2.61 | 0.00 | 0.05 | 0.05   |
| SWIR & NIR | LASTools | I | Burned High Regen | 2.61 | 0.04 | 0.18 | 0.18   |
| SWIR & NIR | LASTools | I | Burned            | 2.61 | 0.02 | 0.14 | 0.14   |
| SWIR & NIR | LASTools | I | Burned Low Regen  | 2.61 | 0.02 | 0.09 | 0.09   |

|                     |          |   |                   |      |      |      |      |
|---------------------|----------|---|-------------------|------|------|------|------|
| SWIR, NIR & Visible | LASTools | A | Unburned          | 3.36 | 0.11 | 0.24 | 0.21 |
| SWIR, NIR & Visible | LASTools | A | Road              | 3.36 | 0.00 | 0.05 | 0.05 |
| SWIR, NIR & Visible | LASTools | A | Burned High Regen | 3.36 | 0.04 | 0.18 | 0.18 |
| SWIR, NIR & Visible | LASTools | A | Burned            | 3.36 | 0.01 | 0.15 | 0.14 |
| SWIR, NIR & Visible | LASTools | A | Burned Low Regen  | 3.36 | 0.02 | 0.10 | 0.10 |
| SWIR, NIR & Visible | LASTools | C | Unburned          | 3.34 | 0.12 | 0.23 | 0.20 |
| SWIR, NIR & Visible | LASTools | C | Road              | 3.34 | 0.00 | 0.05 | 0.05 |
| SWIR, NIR & Visible | LASTools | C | Burned High Regen | 3.34 | 0.04 | 0.18 | 0.18 |
| SWIR, NIR & Visible | LASTools | C | Burned            | 3.34 | 0.02 | 0.14 | 0.14 |
| SWIR, NIR & Visible | LASTools | C | Burned Low Regen  | 3.34 | 0.01 | 0.10 | 0.10 |
| SWIR, NIR & Visible | LASTools | B | Unburned          | 3.34 | 0.12 | 0.23 | 0.20 |
| SWIR, NIR & Visible | LASTools | B | Road              | 3.34 | 0.00 | 0.05 | 0.05 |
| SWIR, NIR & Visible | LASTools | B | Burned High Regen | 3.34 | 0.04 | 0.18 | 0.18 |
| SWIR, NIR & Visible | LASTools | B | Burned            | 3.34 | 0.02 | 0.14 | 0.14 |
| SWIR, NIR & Visible | LASTools | B | Burned Low Regen  | 3.34 | 0.01 | 0.09 | 0.09 |
| SWIR, NIR & Visible | LASTools | E | Unburned          | 3.35 | 0.12 | 0.23 | 0.20 |
| SWIR, NIR & Visible | LASTools | E | Road              | 3.35 | 0.00 | 0.05 | 0.05 |
| SWIR, NIR & Visible | LASTools | E | Burned High Regen | 3.35 | 0.04 | 0.18 | 0.17 |
| SWIR, NIR & Visible | LASTools | E | Burned            | 3.35 | 0.02 | 0.14 | 0.14 |
| SWIR, NIR & Visible | LASTools | E | Burned Low Regen  | 3.35 | 0.01 | 0.10 | 0.10 |
| SWIR, NIR & Visible | LASTools | D | Unburned          | 3.35 | 0.12 | 0.23 | 0.20 |
| SWIR, NIR & Visible | LASTools | D | Road              | 3.35 | 0.00 | 0.05 | 0.05 |
| SWIR, NIR & Visible | LASTools | D | Burned High Regen | 3.35 | 0.04 | 0.18 | 0.18 |
| SWIR, NIR & Visible | LASTools | D | Burned            | 3.35 | 0.02 | 0.14 | 0.14 |
| SWIR, NIR & Visible | LASTools | D | Burned Low Regen  | 3.35 | 0.01 | 0.10 | 0.09 |
| SWIR, NIR & Visible | LASTools | F | Unburned          | 3.70 | 0.12 | 0.24 | 0.20 |

|                     |          |   |                   |      |      |      |      |
|---------------------|----------|---|-------------------|------|------|------|------|
| SWIR, NIR & Visible | LASTools | F | Road              | 3.70 | 0.00 | 0.05 | 0.05 |
| SWIR, NIR & Visible | LASTools | F | Burned High Regen | 3.70 | 0.05 | 0.18 | 0.18 |
| SWIR, NIR & Visible | LASTools | F | Burned            | 3.70 | 0.03 | 0.15 | 0.14 |
| SWIR, NIR & Visible | LASTools | F | Burned Low Regen  | 3.70 | 0.00 | 0.09 | 0.09 |
| SWIR, NIR & Visible | LASTools | H | Unburned          | 3.71 | 0.12 | 0.24 | 0.20 |
| SWIR, NIR & Visible | LASTools | H | Road              | 3.71 | 0.00 | 0.05 | 0.05 |
| SWIR, NIR & Visible | LASTools | H | Burned High Regen | 3.71 | 0.06 | 0.18 | 0.17 |
| SWIR, NIR & Visible | LASTools | H | Burned            | 3.71 | 0.03 | 0.14 | 0.14 |
| SWIR, NIR & Visible | LASTools | H | Burned Low Regen  | 3.71 | 0.00 | 0.09 | 0.09 |
| SWIR, NIR & Visible | LASTools | G | Unburned          | 3.70 | 0.12 | 0.24 | 0.20 |
| SWIR, NIR & Visible | LASTools | G | Road              | 3.70 | 0.00 | 0.05 | 0.05 |
| SWIR, NIR & Visible | LASTools | G | Burned High Regen | 3.70 | 0.06 | 0.18 | 0.17 |
| SWIR, NIR & Visible | LASTools | G | Burned            | 3.70 | 0.03 | 0.14 | 0.14 |
| SWIR, NIR & Visible | LASTools | G | Burned Low Regen  | 3.70 | 0.00 | 0.09 | 0.09 |
| SWIR, NIR & Visible | LASTools | J | Unburned          | 3.72 | 0.12 | 0.24 | 0.21 |
| SWIR, NIR & Visible | LASTools | J | Road              | 3.72 | 0.00 | 0.05 | 0.05 |
| SWIR, NIR & Visible | LASTools | J | Burned High Regen | 3.72 | 0.06 | 0.18 | 0.17 |
| SWIR, NIR & Visible | LASTools | J | Burned            | 3.72 | 0.03 | 0.14 | 0.14 |
| SWIR, NIR & Visible | LASTools | J | Burned Low Regen  | 3.72 | 0.00 | 0.09 | 0.09 |
| SWIR, NIR & Visible | LASTools | I | Unburned          | 3.71 | 0.12 | 0.24 | 0.20 |
| SWIR, NIR & Visible | LASTools | I | Road              | 3.71 | 0.00 | 0.05 | 0.05 |
| SWIR, NIR & Visible | LASTools | I | Burned High Regen | 3.71 | 0.05 | 0.18 | 0.17 |
| SWIR, NIR & Visible | LASTools | I | Burned            | 3.71 | 0.03 | 0.14 | 0.14 |
| SWIR, NIR & Visible | LASTools | I | Burned Low Regen  | 3.71 | 0.00 | 0.09 | 0.09 |
